1 **Ecology and evolutionary history determine plastic responses to environmental variation in two closely**  
2 **related species**

3 *Greg M. Walter*<sup>1\*</sup>, *James Clark*<sup>2</sup>, *Antonia Cristaudo*<sup>3</sup>, *Bruno Nevado*<sup>2</sup>, *Stefania Catara*<sup>3</sup>, *Momchil Paunov*<sup>4</sup>,  
4 *Violeta Velikova*<sup>5</sup>, *Dmitry Filatov*<sup>2</sup>, *Salvatore Cozzolino*<sup>6</sup>, *Simon J. Hiscock*<sup>2</sup> and *Jon R. Bridle*<sup>1</sup>

5 <sup>1</sup>University of Bristol, School of Biological Sciences, Bristol BS8 1TQ, UK

6 <sup>2</sup>University of Oxford, Department of Plant Sciences, Oxford, OX1 3RB, UK

7 <sup>3</sup>University of Catania, Department of Biological, Geological and Environmental Sciences, Catania 95128,  
8 Italy

9 <sup>4</sup>Sofia University St. Kliment Ohridski, Faculty of Biology, Sofia 1164, Bulgaria

10 <sup>5</sup>Bulgarian Academy of Sciences, Institute of Plant Physiology and Genetics, Sofia 1113, Bulgaria

11 <sup>6</sup>University of Naples Federico II, Department of Biology, Naples 80126, Italy

12

13 \* Corresponding Author: Greg M. Walter

14 Email: [g.walter@bristol.ac.uk](mailto:g.walter@bristol.ac.uk)

15

16 **Abstract**

17 Phenotypic plasticity can maintain population fitness in novel or changing environments if it allows the  
18 phenotype to track the new trait optimum. Understanding how adaptation to contrasting environments  
19 determines plastic responses can identify how plasticity evolves, and its potential to be adaptive in response  
20 to environmental change. We sampled 79 genotypes from populations of two closely related but ecologically  
21 divergent ragwort species (*Senecio*, Asteraceae), and transplanted multiple clones of each genotype into four  
22 field sites along an elevational gradient representing each species' native range, the edge of their range, and  
23 in conditions outside their native range. At each transplant site, we quantified differences in survival, growth,  
24 leaf morphology, chlorophyll fluorescence and gene expression for both species. Overall, the two species  
25 differed in their sensitivity to the elevational gradient. As evidence of plasticity, leaf morphology changed  
26 across the elevational gradient, with changes occurring in orthogonal directions for the two species.  
27 Differential gene expression across the four field sites also revealed that the genetic pathways underlying  
28 plastic responses were highly distinct in the two species. Despite the two species having diverged recently,  
29 adaptation to contrasting habitats has resulted in the evolution of distinct sensitivities to environmental  
30 variation, underlain by distinct forms of plasticity.

31 **Keywords:** adaptation, differential gene expression, environmental sensitivity, evolutionary history,  
32 genotype-by-environment interactions, phenotypic plasticity, physiological plasticity, specialisation

33

## 34 **Introduction**

35 The resilience of natural populations and communities to environmental change relies on their ability to  
36 adjust their phenotype to track changes in the environment (Chevin et al. 2010). This can occur via adaptive  
37 evolutionary responses across generations (Bell and Gonzalez 2009), and/or by plasticity within a generation  
38 where a given genotype generates different phenotypes depending on the environment to which it is exposed  
39 (Via et al. 1995; Ghalambor et al. 2007; Charmantier et al. 2008). Both mechanisms (plasticity and  
40 evolutionary change) are part of the response of populations to environmental change (Baythavong and  
41 Stanton 2010; Chevin et al. 2013). Where genetic variation in plastic responses is high, selection on plastic  
42 responses could help to increase the resilience of natural populations in the face of environmental change  
43 (Nussey et al. 2005). If we are to understand the potential for plasticity to increase resilience of natural  
44 populations in response to environmental change, we need to first understand how adaptation shapes  
45 plasticity. We also need to identify the phenotypic change induced by plasticity when genotypes from natural  
46 populations experience novel conditions, and whether there is genetic variation for such plasticity.

47 The effect of adaptation on the nature and magnitude of plastic responses will depend on how plasticity and  
48 selection interact, and the predictability of the environment (de Jong 2005). Phylogeny (Pigliucci et al. 1999;  
49 Kellermann et al. 2018), ecology (Kulkarni et al. 2011) and highly predictable seasonality (Oostra et al.  
50 2018) have been shown to determine plastic responses. However, we do not know to what extent  
51 evolutionary history constrains plastic responses, or whether plasticity is determined by specialisation to a  
52 given environment. It is predicted that more ecologically specialised species should be less phenotypically  
53 plastic and struggle to respond to environmental change (Lortie and Aarssen 1996; Debat and David 2001;  
54 Dal Santo et al. 2018). For example, plants adapted to higher elevations can show reduced plasticity due to  
55 specialisation to their particular environment (Schmid et al. 2017). By quantifying how plasticity varies  
56 among closely related but ecological divergent species, we can better understand how adaptation to  
57 contrasting habitats shapes plasticity, with important consequences for understanding how species can  
58 respond to novel environmental conditions in the future.

59 Genetic variation in plasticity can promote the rapid evolution of plasticity through selection on genotypes  
60 that vary in their level of plasticity (Lande 2009; Chevin and Lande 2011). When genotypes vary in their  
61 response to the environment, they exhibit genotype-by-environment interactions ( $G \times E$ ) that underlie plastic  
62 responses (Pigliucci 2005; Josephs 2018). Plasticity is expected to be maintained within specific parameters  
63 when the environment is predictable, leading to adaptive plasticity within the environment limits experienced  
64 during adaptation (Bradshaw 1965; Schlichting 1986; Baythavong and Stanton 2010). Whether such  
65 plasticity will continue to be adaptive when exposed to novel conditions, such as those imposed by climate

66 change, remains an empirical issue (Ghalambor et al. 2007). Strong stabilising selection created by  
67 predictable environments is expected to lead to specific plastic responses and reduce genetic variation for  
68 plasticity (Oostra et al. 2018). By contrast, populations adapted to a wider range of habitats that are more  
69 spatially and temporally variable are predicted to maintain genetic variation in plastic responses, increasing  
70 the potential for selection on plasticity in response to environmental change (Chevin et al. 2010). Detecting  
71 and characterising patterns of G×E for a range of naturally occurring genotypes can help us understand  
72 whether evolutionary responses can occur even if plasticity is constrained in certain directions (Via 1993;  
73 Chevin and Hoffmann 2017).

74 The genetic architecture underlying variation in plasticity is largely unknown (Fusco and Minelli 2010).  
75 Plastic responses at the gene expression level are most likely controlled either by epiallelic control of the  
76 genes themselves or allelic variation in the regulators of the genes (Rockman and Kruglyak 2006). If allelic  
77 (sequence changes) or epiallelic (e.g. DNA methylation, chromatin remodelling, post-transcriptional  
78 modifications) variation underlying the traits become fixed during local adaptation, constraints to plasticity  
79 may arise (Gibson and Wagner 2000; Shaw et al. 2014; Oostra et al. 2018). For example, at the level of a  
80 given genotype, homogeneous or predictable environments should lead to stable epiallelic controls that are  
81 resistant to resetting, which may induce a loss of plasticity within a generation (Herman et al. 2014). At a  
82 population level, predictable environments will lead to a reduction in standing variation in plasticity through  
83 purifying selection acting either on the genetic regulators (e.g. transcription factors) or long term epiallelic  
84 changes, such as transgenerational DNA methylation (Colicchio et al. 2015; Oostra et al. 2018). If plastic  
85 responses in an ecologically important trait match environmental variation closely, variation in the regulatory  
86 network affecting the expression of the underlying gene(s) will be selected against (Shaw et al. 2014).  
87 Canalisation and specialisation can therefore reduce plasticity in the traits involved in adaptation to any given  
88 environment.

89 In this study, we quantify variation in environmental sensitivity in two closely related species of ragwort that  
90 are adapted to contrasting habitats located at different elevations on Mt. Etna, Sicily. *Senecio*  
91 *chrysanthemifolius* (hereafter, *S.ch*) is an annual/short-lived perennial with dissected leaves that occupies  
92 disturbed habitats (e.g., abandoned land and roadsides), as well as gardens, vineyards and fruit orchards on  
93 the foothills of Mt. Etna c. 400-1,000m a.s.l (above sea level) (**Fig. 1a**), and more broadly, Sicily. By  
94 contrast, *S. aethnensis* (hereafter, *S.ae*) has a perennial life history and entire leaves and is endemic to lava  
95 flows c. 2,000-2,600m a.s.l on Mt. Etna that are covered by snow each winter (**Fig. 1b**). These two species  
96 diverged relatively recently (Chapman et al. 2013), with an estimate of c.150,000 years before present  
97 (Osborne et al. 2013) that corresponds to the approximate time of the uplift of Mt. Etna, which created the

98 new high altitude environment to which *S.ae* is adapted (Chapman et al. 2013). The recent shared ancestry of  
99 the two species is reflected by very low genetic divergence, despite large differences in habitat, phenotype  
100 and life history (Chapman et al. 2016).

A) *S. chrysanthemifolius*

B) *S. aethnensis*

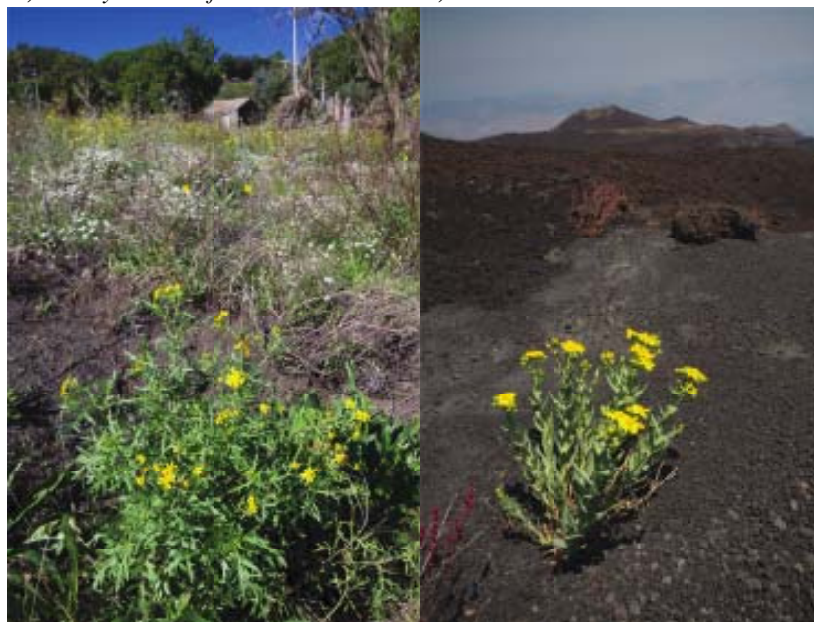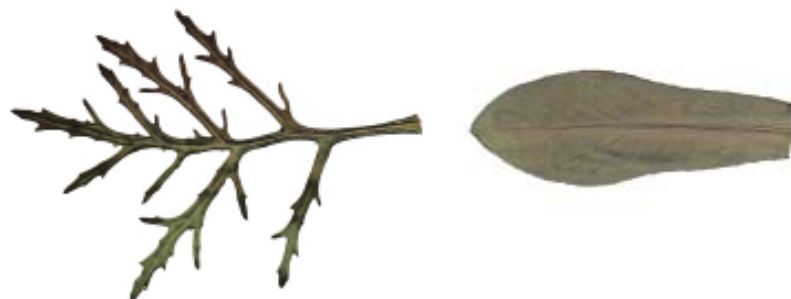

101 **Fig. 1** *Senecio chrysanthemifolius* occupies disturbed habitats below c.1,000m a.s.l, and has thin, dissected leaves. *Senecio*  
102 *aethnensis* inhabits lava flows and has thicker, smooth-margined leaves with a thick waxy cuticle.  
103

104

105 Given *S.ae* exists in small populations endemic to high elevations on Mt. Etna, while *S.ch* is found in a  
106 variety of lower-elevation habitats across Sicily, we predicted that *S. ae* would show higher specialisation in  
107 its plasticity, associated with: (a) lower tolerances to conditions outside its home range, and (b) lower levels  
108 of plasticity that prevent *S.ae* responding positively to environmental variation. In order to test this we  
109 sampled c. 40 genotypes of each species, from several natural populations per species, and then reciprocally  
110 transplanted multiple cuttings of each genotype to four transplant sites (6-15 cuttings/individual/transplant  
111 sites) across an elevational range that included the home range of each species (500m for *S.ch* and 2,000m  
112 for *S.ae*), and two intermediate elevations (1,000m and 1,500m). We found some support for our predictions,  
113 with both species suffering at elevational extremes outside their range, but this was associated with similar

114 levels of plasticity in both species. However, the direction of plasticity differed greatly, with species-specific  
115 patterns observed at the phenotypic, physiological and gene expression levels.

## 117 **Methods and materials**

### 118 *Sampling natural populations*

119 We sampled fruits (achenes), hereafter referred to as ‘seeds’ as they are functionally equivalent, and took  
120 cuttings from individuals in natural populations of both species after plants started flowering (May-June 2017  
121 for *S.ch*, and July 2017 for *S.ae*). The difference in timing was because *S.ae* develops more slowly and  
122 flowers later than *S.ch* due to it occupying a high-elevation habitat. We only sampled from plants that were  
123 large enough to take material for more than 30 cuttings. For *S.ch*, we sampled from 88 individuals at five  
124 sites, each a geographically separated patch of individuals representing potentially discrete populations  
125 (Table S1). For *S.ae*, we sampled from 87 individuals at four different elevations (2,600m a.s.l [above sea  
126 level], 2,500m a.s.l, 2,400m a.s.l and 2,300m a.s.l) on both the North and South slopes of Mt. Etna (Table  
127 S1). Where possible, we avoided sampling plants less than 10 m apart to minimise the risk of sampling close  
128 relatives, but this was difficult for *S.ch* because patches of individuals were very small (<30 individuals in a  
129 100m radius).

### 130 *Physiological differences between species*

131 To identify physiological differences between species under common garden conditions, we grew seeds in a  
132 growth cabinet with controlled conditions: 350  $\mu\text{mol m}^{-2} \text{s}^{-1}$  light intensity (photosynthetic photon flux  
133 density), 25/20°C  $\pm$  3°C day/night temperature, 65-70% relative air humidity, 14/10h photoperiod and 400  
134  $\mu\text{mol mol}^{-1}$  ambient CO<sub>2</sub> concentration. Seeds were germinated using mechanical scarification, and seedlings  
135 transplanted into 70 mm square pots with standard potting mix. From eight maternal families of *S.ch* we grew  
136 24 individuals, and from 10 maternal families of *S.ae* we grew 30 individuals. Seedlings were grown for two  
137 months and physiological measurements taken. With a Dualex+<sup>®</sup> instrument (ForceA, France), we measured  
138 leaf pigment content for concentrations of chlorophyll, anthocyanins, flavanols and estimated the nitrogen  
139 balance index. Using an LCpro (ADC BioScientific, UK), we measured photosynthetic gas exchange.  
140 Intrinsic water use efficiency (iWUE) was calculated as a ratio between photosynthesis and stomatal  
141 conductance. To measure chlorophyll fluorescence, we used an IMAGING-PAM M-series chlorophyll  
142 fluorometer (Heinz Walz GmbH, Effeltrich, Germany). With the output of the fluorometer, we quantified  
143 two mechanisms of physiological light defense. The mechanism representing the unregulated dissipation of  
144 heat is the quantum yield of non-regulated energy dissipation, calculated as  $Y(NO) = \frac{1}{NPQ + 1 + qL(\frac{F_m}{F_o} - 1)}$ ,

145 where  $qL$  is the parameter representing photochemical quenching, and  $NPQ = \frac{F_m - F'_m}{F'_m}$ , where  $F_m$  and  $F'_m$   
146 represent the maximal fluorescence in a dark and light adapted state, respectively (Kramer et al. 2004). The  
147 second mechanism for light protection that regulates heat dissipation is the quantum yield of regulated energy  
148 dissipation, calculated as  $Y(NPQ) = 1 - Y(II) - Y(NO)$  (Kramer et al. 2004).

#### 149 *Field transplant experiment*

150 In the glasshouse, cuttings (i.e., clones) from all individuals sampled from natural populations (hereafter,  
151 genotypes) were cut into 5cm stem segments, each possessing 2-3 leaf nodes. Each smaller cutting was then  
152 dipped in rooting plant growth regulator for softwood cuttings (Germon® Bew., Der. NAA 0.5%, L. Gobbi,  
153 Italy) and placed in a compressed mix of coconut coir and perlite (1:1) in one cell of an 84-cell tray. All  
154 cuttings from each genotype were kept together in one half of a tray, with tray positions randomised regularly  
155 to randomise environmental or positional effects. Trays were kept moist and checked regularly for cuttings  
156 that successfully produced roots (roots extending out of the bottom of tray). For each genotype, rooted  
157 cuttings were randomized into experimental blocks and transplanted at four field sites. From the initial  
158 genotypes, we transplanted 37 *S.ch* genotypes and 42 *S.ae* genotypes that produced enough cuttings with  
159 roots.

160 Field transplant sites were located at four elevations (500m a.s.l, 1,000m a.s.l, 1,500m a.s.l and 2,000m a.s.l)  
161 along a transect on the south-eastern side of Mt. Etna. The 500m site was located in a garden among fruit  
162 trees and grape vines, the 1,000m site on an abandoned vineyard among oak trees (*Quercus ilex*), the 1,500m  
163 site among an apple and pear orchard, and the 2,000m site surrounded by pine trees on a lava flow from  
164 1983. Soil is characterised as a silty sand at elevations between 500m and 1,500m, but changes to volcanic  
165 sand at 2,000m. At each transplant environment we deployed four data loggers (Tinytag Plus, Gemini Data  
166 Loggers, UK) at each site, which measured temperature hourly. We also took three soil samples for each  
167 transplant site, which were analysed for 36 variables that included nutrients, salts and ions (Nucleo Chimico  
168 Mediterraneo laboratories, Catania, Italy). To analyse the soil data, we used Multi-Dimensional Scaling  
169 (MDS) to calculate the scaled distance between replicate soil samples taken at all transplant sites.

170 Genotypes were replicated at each transplant site by transplanting multiple cuttings from each genotype into  
171 three identical experimental blocks. The position of cuttings was randomised with respect to genotype, and  
172 transplanted into 20x7 grids, with cuttings separated from each other by 40cm (*S.ch* block  $n=109$ ; site  $n =$   
173  $327$ ; total  $N = 1,308$ ; *S.ae* block  $n = 130$ ; site  $n = 390$ ; total  $N = 1,560$ ). Depending on the number of cuttings  
174 that successfully produced roots, we transplanted 6-15 cuttings per genotype at each transplant site (exact  
175 numbers presented in Table S1). Cuttings of *S.ch* were transplanted in June-July 2017, whereas cuttings of

176 *S.ae* were transplanted (into experimental blocks separate to *S.ch*) at the start of August 2017. The difference  
177 in timing was because, as mentioned earlier, we were restricted to sampling from natural populations of *S.ae*  
178 much later than *S.ch*. Following the transplant, cuttings were watered daily to encourage establishment. To  
179 prevent death during high temperatures in July-August (consistently greater than 35°C), we watered cuttings  
180 daily during this period, which allowed assessments of phenotypic responses to what were still stressful  
181 conditions.

### 182 *Characterising morphology*

183 We recorded mortality approximately every two weeks, and after all cuttings started flowering we measured  
184 phenotypic traits of all plants at a single time point (November 2017). To characterise leaf morphology, we  
185 sampled and pressed 3-5 young but fully expanded leaves from each cutting (five and four months after  
186 transplant for *S.ch* and *S.ae*, respectively). Leaves were scanned and morphology quantified using the  
187 program Lamina (Bylesjo et al. 2008), which generates estimates of leaf area, perimeter, the number of  
188 indentations, and the average width and depth of each indentation. To estimate the density of indentations  
189 along the leaf margin, we standardized the number of indentations by the perimeter. To capture leaf  
190 complexity we calculated  $\text{perimeter}^2/\text{area}^2$ , where lower numbers indicate fewer indentations, i.e. more entire  
191 leaves.

### 192 *Chlorophyll fluorescence*

193 To capture the energy storage capacity of the light-dependent photosynthetic reactions (i.e., photosynthetic  
194 capacity) for both species across the elevational gradient, at each transplant site we measured chlorophyll *a*  
195 fluorescence for four leaves on each of three clones from five genotypes of each species. We took  
196 measurements at two transplant sites each day within one week in October 2017. We also took a temporal  
197 replicate measurement for the same clones at the same site on a second day. To take measurements, we put  
198 leaf clips on four leaves of each plant and dark-adapted the plants by covering them with large black plastic  
199 containers to exclude sunlight for 30 minutes. We then took fluorescence induction curve measurements for 2  
200 seconds at 3,500  $\mu\text{mol s}^{-1}\text{m}^{-2}$  photosynthetic photon flux density from each leaf (clip) using a Handy PEA  
201 instrument (Hansatech Instruments Ltd., UK). The raw experimental data was processed by Handy PEA  
202 software and then by HandyBarley software. Using the JIP test (Tsimilli-Michael and Strasser 2013), we  
203 calculated the total performance of photosystem I and II as:  $PI_{total} = \frac{F_V}{F_M} \times \frac{V_J}{M_0} \times \frac{F_V}{F_0} \times \frac{1-V_J}{V_J} \times \frac{1-V_I}{V_I-V_J}$ , where  $F_0$   
204 is the minimal fluorescence intensity,  $F_M$  the maximal fluorescence,  $F_V$  the maximal variable fluorescence  
205 ( $F_V = F_M - F_0$ ),  $M_0$  the approximated initial slope of fluorescence change (normalised on  $F_V$ ), and  $V_J$  and  $V_I$   
206 the relative variable fluorescence levels recorded at 2ms and 30ms, respectively (also normalised on  $F_V$ ).



## 207 *Statistical analyses of plasticity*

208 To quantify morphological plasticity across the four transplant sites we first estimated the mean for all leaf  
209 traits for a given cutting at a given transplant site. We standardised the morphological data to a mean of zero  
210 and standard deviation of one, and then used a Principal Components Analysis (PCA) with five leaf  
211 morphology traits. The first two principal components described 88.7% of the total variation. We used these  
212 two PC axes for analyses of plasticity in leaf morphology, as described below.

213 To compare differences in growth, survival, leaf morphology and chlorophyll fluorescence across transplant  
214 sites and for both species, we used linear mixed models in R v.3.6.1 (R Core Team 2019 ) within the package  
215 ‘*lme4*’ (Bates et al. 2015),

$$216 \quad y_{ijklm} = T_i + S_j + T_i \times S_j + T_i \times G_{k(j)} + B_{l(i)} + e_{m(ijkl)} . \quad (1)$$

217 Separate implementations of equation 1 were used for different variables of interest, each of which was  
218 included as the univariate response variable ( $y_{ijklmn}$ ). Changes in the response variable across transplant  
219 sites were modelled by the  $j$ th species ( $S_j$ ) in the  $i$ th transplant site ( $T_i$ ) and their interaction ( $T_i \times S_j$ ), which  
220 were all included as fixed effects. Random effects included the interaction between transplant site and  
221 genotype  $T_i \times G_{k(j)}$  (individuals sampled in the natural populations), and experimental block within each  
222 environment ( $B_{l(i)}$ ). The residual error variance was captured by  $e_{m(ijkl)}$ .

223 Equation 1 was implemented as a generalized linear mixed model with a binomial error distribution for  
224 survival (after summer 2017 and after winter 2018). The remaining phenotypic traits were normally  
225 distributed (plant height, leaf area, specific leaf area, principal components of leaf morphology and  
226 chlorophyll fluorescence), for which we used a linear mixed model with a Gaussian error distribution. For  
227 each implementation of equation 1, we tested the significance of the interaction between transplant site and  
228 species using likelihood ratio tests, which specifically tested whether changes in morphology across  
229 transplant site differed between the species. To test whether differences in morphology between transplant  
230 sites were significant for each species, we conducted pairwise t-tests adjusted for multiple comparisons,  
231 which we implemented using the R package ‘*emmeans*’ (Lenth 2019).

232 To test for significant differences in G×E within each species, we applied equation 1 separately for each  
233 species. We tested the significance of transplant site (the only fixed effect) using the Kenwood-Roger test in  
234 the R package ‘*pbkrtest*’ (Højsgaard 2017). To separate the effect of genotype from G×E, we included  
235 genotype and the genotype×elevation interaction as separate random effects. We tested the significance of all  
236 random effects using likelihood ratio tests. To identify whether G×E was created by changes in the  
237 magnitude of among-genotype variance across elevation, or by differences in reaction norms (i.e., a

238 change in rank of genotypes across elevation), we used the parameters estimated from equation 1 on PC1 and  
239 PC2 as response variables, and implemented the equation (Cockerham 1963; Johnson 2007; Friedman et al.  
240 2019):

$$241 \quad \sigma_{G \times E}^2 = \frac{\sum_{i=1}^h \sum_{j=1}^h [2\sigma_i \sigma_j (1-r_{ij}) + (\sigma_i - \sigma_j)^2]}{h(h-1)}, \quad (2)$$

242 where  $\sigma$  represents square root of the variance among genotypes for the  $i$ th and  $j$ th transplant sites. The  
243 number of sites is represented by  $h$ , for which we only compared the elevational extremes (500m and  
244 2,000m). The first half of the equation represents G×E as differences in reaction norms, with  $r_{ij}$  representing  
245 the genotypic correlation between the  $i$ th and  $j$ th habitats. The second half of the equation represents G×E as  
246 changes in the magnitude of among genotype variance.

#### 247 *Changes in gene expression: Sampling of plant tissue and RNA extraction*

248 To quantify gene expression, we sampled young leaves from all cuttings at a single specific time-point  
249 following the initial transplant. More specifically, after transplanted cuttings showed sufficient growth (12-15  
250 new, fully expanded leaves also associated with the emergence of branches), we collected 2-3 young leaves  
251 from all plants (July 2017 for *S.ch*; October 2017 for *S.ae*), which we stored in RNAlater at 4°C for 24 hours,  
252 and then subsequently at -80°C. Three genotypes of each species were selected at random, and three clones  
253 sampled at each transplant site (total of 72 samples, 36 per species). Extraction of total RNA was performed  
254 using QIAgen RNeasy kits with  $\beta$ -mercaptoethanol added to the extraction buffer. Library preparation and  
255 RNA sequencing was performed at the Oxford Genomics Centre on an Illumina HiSeq4000 platform,  
256 producing 75bp paired-end reads.

#### 257 *Transcriptome assembly*

258 The quality of raw reads was assessed in FastQC v0.11.4 and low quality bases and adaptors trimmed using  
259 TrimGalore v0.6. (Phred quality cut-off score = 20). For each species, trimmed reads from all samples were  
260 combined and a reference transcriptome was *de novo* assembled using Trinity v2.8.4 (Haas et al. 2013). Each  
261 transcriptome was filtered using the EvidentialGene (<http://arthropods.eugenes.org/EvidentialGene/>) and  
262 contaminants were removed using the MCSC Decontamination pipeline (Lafond-Lapalme et al. 2017), with  
263 the filter set to Viridiplantae. Orthologous transcripts between the two species were identified using  
264 Orthofinder v2.3.3 with default parameters (Emms and Kelly 2019). The two transcriptomes were filtered to  
265 contain only orthologous transcripts between the two species. The final orthologous transcriptomes each  
266 contained 23,622 transcripts with an N50 of 1509 and 1515 for *S.ae* and *S.ch*, respectively. Annotation of the  
267 transcriptomes resulted in 7579 unique GO terms for 14701 transcripts and on average there were 7.2 GO

268 terms per transcript.

### 269 *Differential expression*

270 Trimmed reads were mapped to each species reference transcriptome using Salmon v0.13.1 (index kMer  
271 length = 29, --gcBias) (Patro et al. 2017). Transcript abundance estimates were imported into R using the  
272 txImport pipeline. Read counts were normalised by transcript size, library size and filtered based on counts >  
273 5 across half of all samples. Differential expression was estimated in DESeq2 (Love et al. 2014) according to  
274 the following formula:

$$275 \quad \text{Counts} \sim \text{Genotype} + \text{Transplant Site} + \text{Genotype:Transplant Site}$$

276 Each treatment was compared with the home transplant site of each species (2000m for *S.ae* and 500m for  
277 *S.ch*), with differentially expressed genes determined based on an adjusted p-value < 0.01 (Benjamini and  
278 Hochberg 1995) and a log fold change > 2 for overexpression or < -2 for underexpression. Log fold changes  
279 were shrunk using the ‘apeglm’ method and were used to rank genes based on high overexpression and  
280 underexpression.

281 To compare the magnitude of transcriptional responses between transplant sites, genotypes and their  
282 interactions, we estimated an average log<sub>2</sub>-fold change of all genes as a response to each contrast of each  
283 factor (Love et al. 2014). Significant differences in this response for each transcript were compared using a  
284 two-sided Wilcoxon signed-rank test.

### 285 *Annotation and functional enrichment*

286 Each transcriptome was annotated following the Trinotate pipeline (Bryant et al. 2017). Nucleotide  
287 sequences were used to perform a blastx search against the Uniprot database, selecting in each case the single  
288 best hit (< 1e-5). Predicted amino-acid sequences were generated using TransDecoder v5.5  
289 (<https://transdecoder.github.io>) and protein sequences were blasted against the Uniprot database. Protein  
290 sequences were also used to search the Pfam database for conserved protein motifs using HMMER  
291 (hmmer.org). Finally, protein sequences were used to search for signalling proteins using Signalp  
292 (Armenteros et al. 2019).

293 To test for significant representation of functional categories among differentially expressed genes, Gene  
294 Ontology enrichment analyses were performed using topGO v2.3.6 (Alexa and Rahnenfuhrer 2019).  
295 Enrichment was determined using genes that were significantly differentially expressed (adjusted p values <  
296 0.01) between the native transplant site and the furthest transplant site and Kolmogorov-Smirnoff (KS) test  
297 using the ‘weight’ algorithm.

298

## 299 Results

### 300 *Physiological differences between species under laboratory conditions*

301 Under common garden conditions *S.ch* and *S.ae* showed large differences in plant physiology, reflecting  
302 strong habitat differences. The maximum quantum yield of photosystem II ( $F_v/F_m$ ), a specific indicator of  
303 photoinhibition, did not differ between two species (data not shown). However, compared to *S.ch*, *S.ae*  
304 exhibited significantly greater values for the quantum yield of non-regulated energy dissipation [Y(NO)]  
305 (**Fig. 2a**;  $t=2.351$ ,  $P=0.0217$ ), which indicates that both photochemical energy conversion and protective  
306 regulatory mechanisms are less efficient in *S.ae*. Higher values of Y(NO), and similar values of Y(NPQ) for  
307 the two species (data not shown), reflect suboptimal capacity of photoprotective reactions, which could lead  
308 to greater photodamage for *S.ae*. *S.ch* showed evidence of higher intrinsic water use efficiency than *S.ae*  
309 (**Fig. 2b**;  $t=3.875$ ,  $P=0.0002$ ), suggesting that *S.ch* leaves possess traits allowing better adaptation to drought  
310 than *S.ae*. We found evidence that the two species differed in the concentration of leaf pigments in the cuticle  
311 of their leaves. *S.ae* showed greater leaf cuticle concentrations of chlorophyll (**Fig. 2c**;  $t=2.085$ ,  $P=0.0388$ )  
312 and flavanols (**Fig. 2d**;  $t=4.399$ ,  $P<0.0001$ ). Anthocyanin content was similar for the two species (data not  
313 shown).

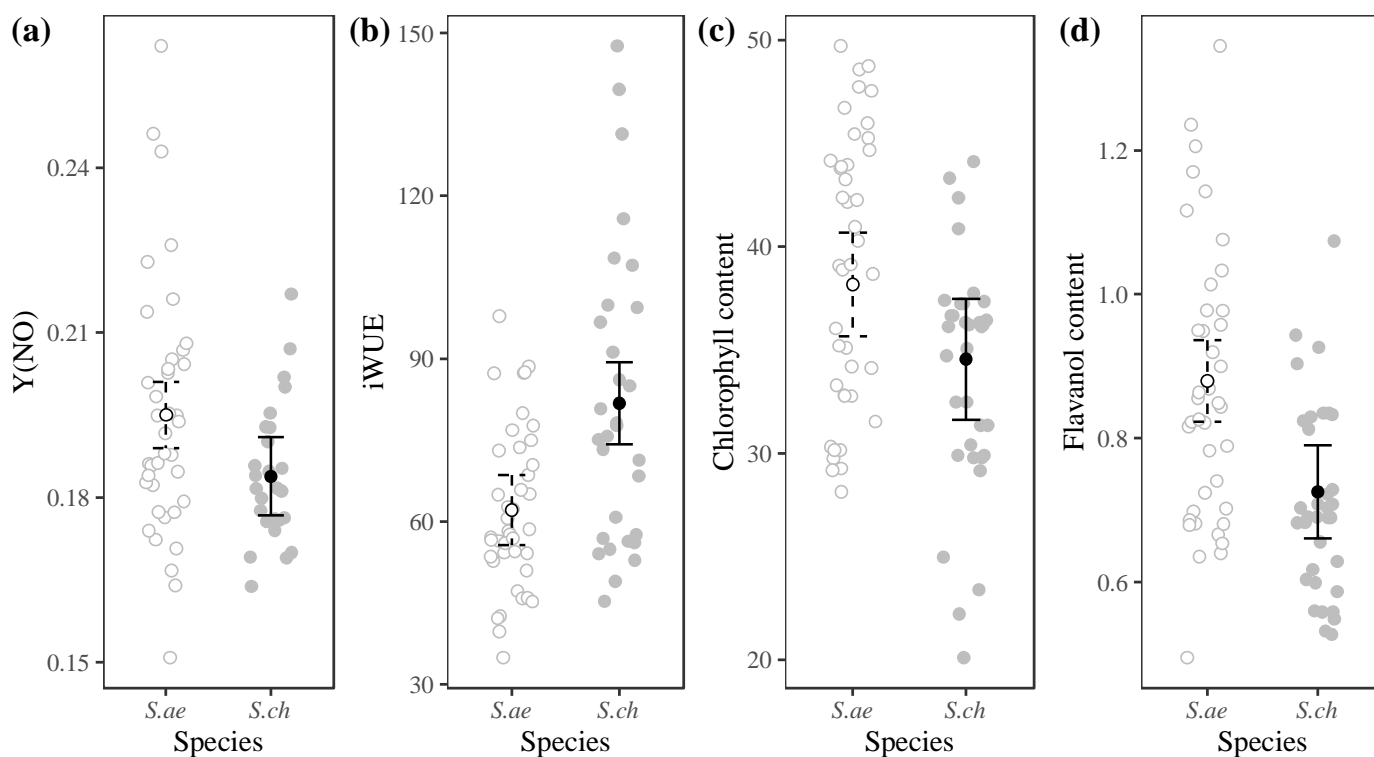

314  
315  
316  
317

**Fig. 2** Physiological differences between species grown from seeds under common garden conditions in the laboratory. Filled circles and solid lines represent *S.ch*, while unfilled circles and dashed lines represent *S.ae*. Gray circles represent individual plants measured and credible intervals represent the 95% confidence intervals. (a) *S.ae* exhibited greater values of Y(NO), suggesting it

318 will be more prone to photodamage. **(b)** *S.ch* showed higher intrinsic water use efficiency, while *S.ae* showed higher leaf  
319 chlorophyll content **(c)** and a higher flavanol content **(d)**.

320

### 321 *Transplant survival, growth and flowering*

322 Temperature data loggers at the transplant sites revealed contrasting climatic conditions associated with  
323 elevation variation, with extreme heat (regularly exceeding 40°C) present at 500m and 1,000m during  
324 summer, and extreme cold (regularly below 0°C) at 1,500m and 2,000m during winter (**Fig. 3a**). Soil profiles  
325 separated the four transplant sites in a linear fashion along the first axis (MDS1), which represented a gradual  
326 change in soil type and reduction in nutrients (amount of organic material, total nitrogen, cation exchange  
327 capacity and exchangeable ions) at higher elevations (**Fig. 3b**). The second axis (MDS2) described  
328 differences between the 1,000m site and the other sites, associated with greater concentrations of various  
329 salts (higher electrical conductivity, and higher soluble nitrates, calcium and magnesium).

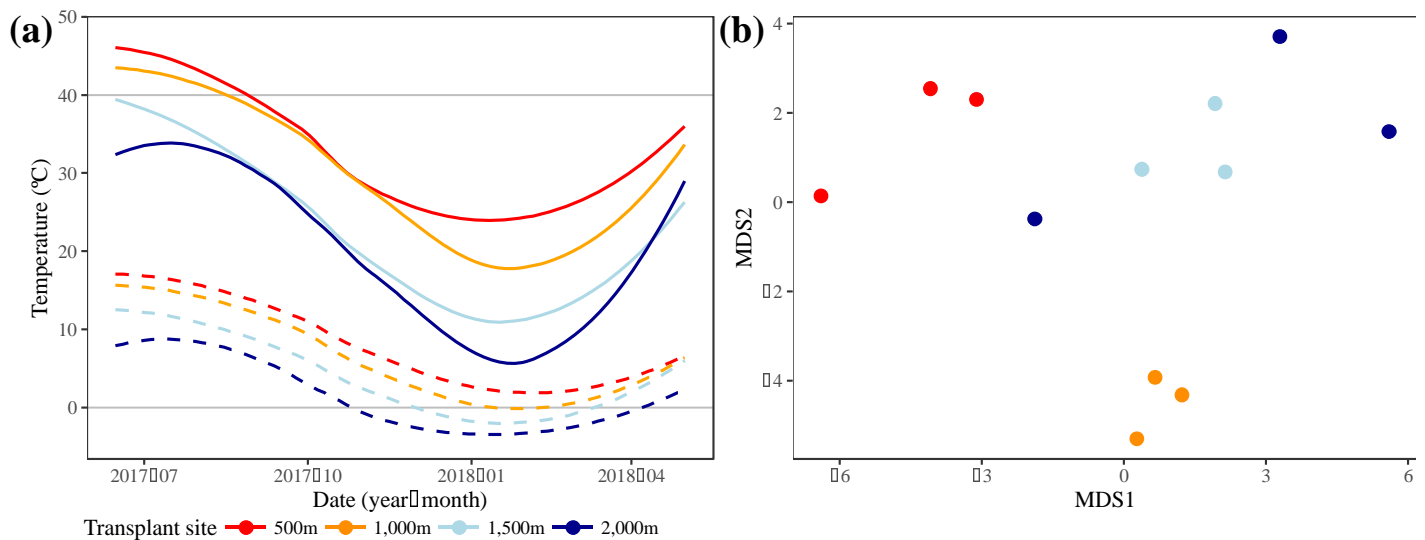

330

331

332 **Fig. 3** Differences in environment for the four transplant sites at four elevations. **(a)** Average daily maximum (solid lines) and  
333 minimum (dashed lines) for three data loggers at each site, for the duration of the transplant. Gray shading represents the standard  
334 error for estimating the coefficients. Higher elevations remained below 40°C in the summer and dropped well below zero in the  
335 winter. **(b)** Differences in soil composition for 35 soil variables captured by a multidimensional scaling analysis.

336

337 Transplanted cuttings of *S.ae* showed high mortality at low elevations over summer, but survived well at high  
338 elevations over winter (**Fig. 4a**). Those *S.ae* plants that did survive at low elevations also grew vigorously  
339 (**Fig. 4b**). By contrast, *S.ch* survived well at all elevations over summer, but suffered high mortality over  
340 winter at 2,000m (**Fig. 4a**). *S.ch* grew well at all elevations and showed a greater difference in growth across  
341 elevation than *S.ae* (**Fig. 4b**). To test whether the survival rates in this 2017 experiment were consistent  
342 across years, we conducted a similar transplant in 2018 by transplanting both species at the same time (total  
343 N = 984 cuttings) in spring (April) and providing less supplementary water. In the 2018 transplant

344 experiment we found very similar patterns of survival. After summer, only 6% and 3% of *S.ae* plants  
345 remained at 500m and 1,000m, respectively, as compared to 79% and 39% for *S.ch* (**Table S2**), which  
346 suggested that the 2017 experiment represented typical patterns of mortality.

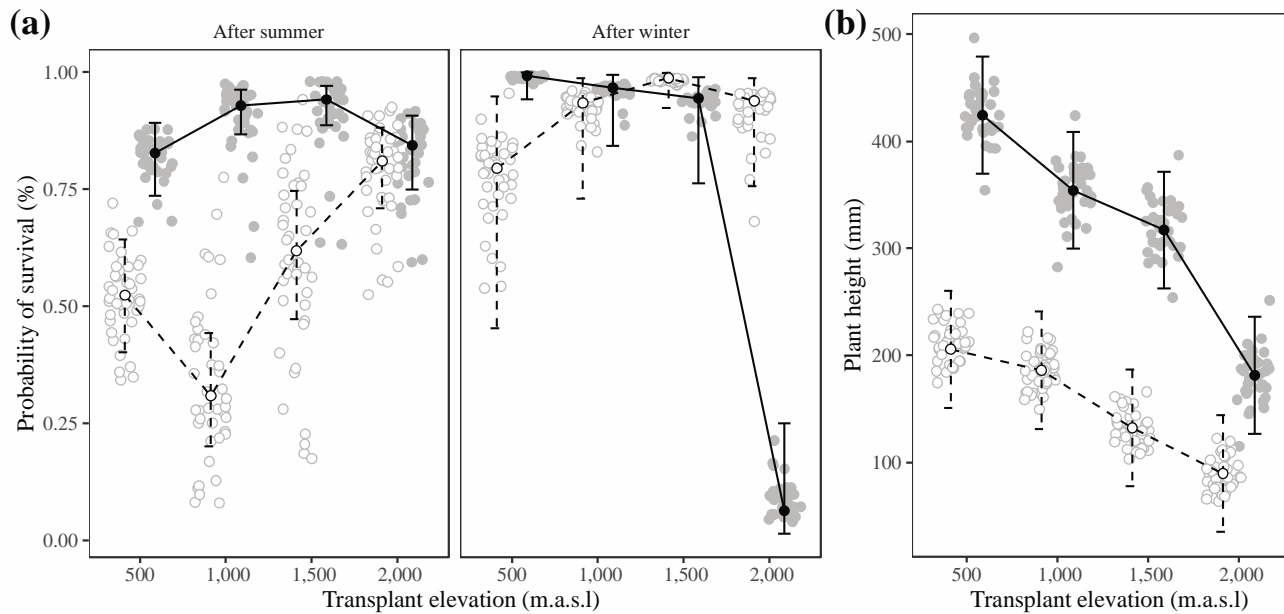

347

348 **Fig. 4** Variation in survival, growth and flowering success of both species across all transplant sites. Filled circles and solid lines  
349 represent *S.ch*, while unfilled circles and dashed lines represent *S.ae*. Grey points represent the mean of all cuttings for each  
350 genotype sampled in the natural populations. Credible intervals represent 95% confidence intervals. (a) Survival after summer was  
351 high for *S.ch*, but low for *S.ae* away from its home site. Both species survived well after winter, except for *S.ch* at high elevation.  
352 (b) Plants grew larger at lower elevations, and *S.ch* grew taller overall.

353

### 354 *Morphological and physiological plasticity*

355 Despite low survival of *S.ae* at lower elevations, enough clones remained to measure almost all genotypes at  
356 each transplant site, with only 2-3 *S.ae* genotypes missing from our assays of plasticity at 500m, 1,000m and  
357 1,500m. Plasticity in leaf morphology was estimated by quantifying changes in PC axes 1 and 2 across  
358 elevations. The first two principal components described 74.8% and 13.9% of total variation, respectively  
359 (**Fig. 5**).

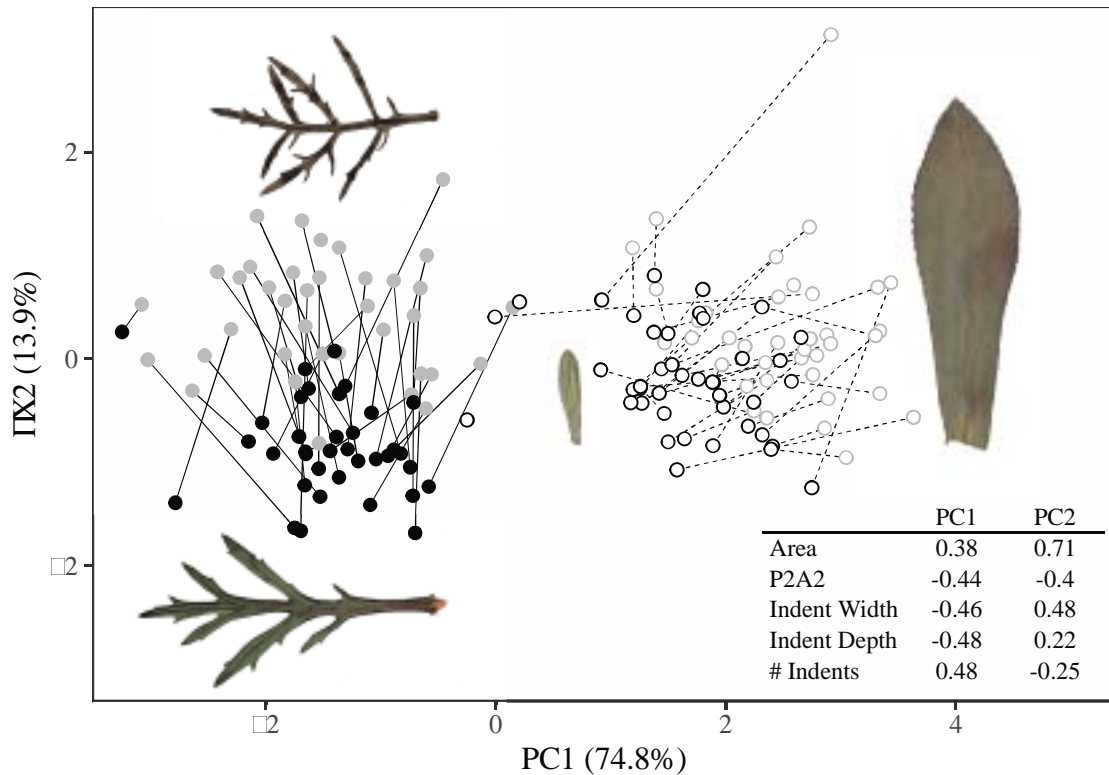

360  
 361 **Fig. 5** Principal component analysis for leaf morphology of both species measured at the four transplant elevations, but with only  
 362 the extreme (500m and 2,000m) elevations presented for simplicity. Filled circles and solid lines represent all genotypes of *S.ch*,  
 363 and unfilled circles and dashed lines represent the *S.ae* genotypes. Gray circles represent morphology at 500m, with black circles  
 364 representing morphology at 2,000m. Table inset shows the trait loadings for both PC axes. *S.ae* changes morphology between  
 365 500m and 2,000m for PC1, which also represents species differences. By contrast, *S.ch* changes morphology between 500m and  
 366 2,000m for PC2. Inset leaf images represent the extreme differences across elevation for PC1 (*S.ae*), and for PC2 (*S.ch*).

367  
 368 Both species showed morphological plasticity as changes in leaf morphology across the four transplant sites,  
 369 but patterns differed between the two species. The first principal component described differences between  
 370 species as well as phenotypic differences associated with elevation for *S.ae* (**Fig. 6a**; PC1 species $\times$ elevation  
 371  $\chi^2(3) = 28.83$ ,  $P < 0.0001$ ). The second principal component described differences between the four transplant  
 372 sites for *S.ch*, but not for *S.ae* (PC2 species $\times$ elevation  $\chi^2(3) = 7.33$ ,  $P = 0.0621$ ). Only the highest and lowest  
 373 elevation transplant sites were significantly different in leaf size for *S.ch*, whereas *S.ae* showed significant  
 374 and consistent differences in leaf size across the range of transplant sites (**Fig. 6b**; species $\times$ elevation  $\chi^2(3) =$   
 375  $9.01$ ,  $P = 0.0290$ ).

376 To test whether species differed significantly in their levels of leaf investment, we calculated specific leaf  
 377 area (SLA; leaf area per unit leaf weight) and implemented equation 1. We found a steep reduction in SLA as  
 378 elevation increased for *S.ae*, but a shallower reduction for *S.ch* (**Fig. 6c**; species $\times$ elevation  $\chi^2(3) = 22.54$ ,  
 379  $P < 0.0001$ ), suggesting *S.ae* changed leaf investment at lower elevations by producing lighter leaves for a  
 380 given leaf size.

381 To estimate traits associated with physiological responses of these species, we measured chlorophyll  
382 fluorescence and calculated the total performance index ( $PI_{total}$ ), which reflects the energy conservation  
383 capacity of the photosynthetic machinery for both photosystem I and II (i.e., the total photosynthetic  
384 activity). We found that *S.ch* showed no change in  $PI_{total}$  across elevation, while *S.ae* showed a steady decline  
385 in  $PI_{total}$ , suggesting reduced photosynthetic activity of *S.ae* at lower elevations (**Fig. 6d**; species $\times$ elevation  $\chi^2$   
386 (3) = 24.59,  $P < 0.0001$ ).

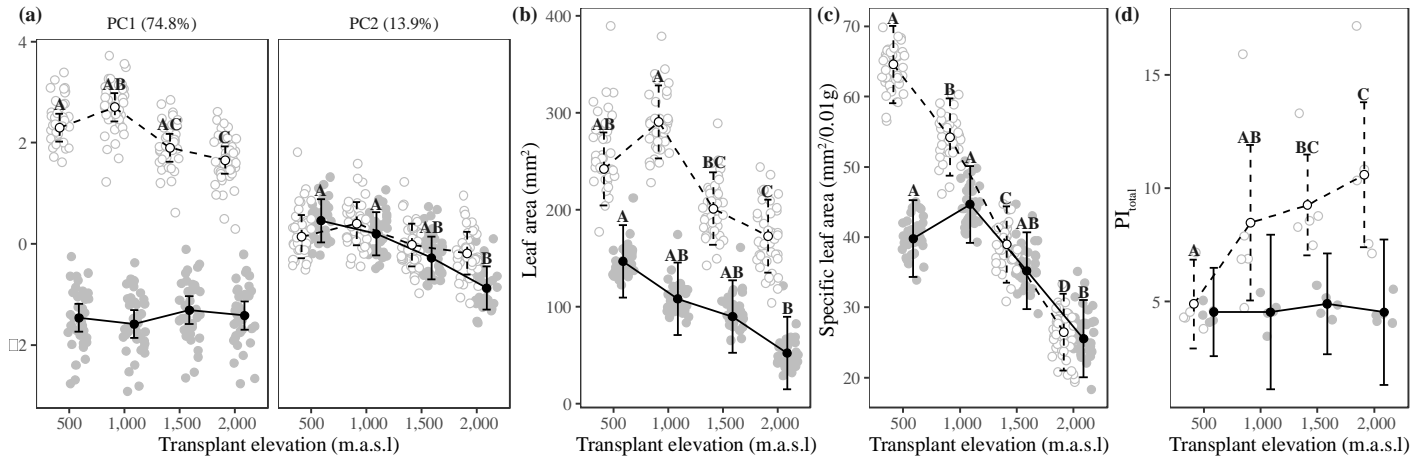

**Fig. 6** Variation in leaf morphology, leaf size and leaf weight across transplant sites. Filled circles and solid lines represent *S.ch*, while unfilled circles and dashed lines represent *S.ae*. Points with credible intervals (95% confidence intervals) represent the mean for each species, with lines connecting the transplant sites. Letters denote significant differences between transplant sites tested using pairwise tests conducted within each species. Grey points represent the mean of all cuttings for each genotype, within species. (a) *S.ae* showed significant changes in multivariate leaf morphology across transplant sites for PC1, whereas *S.ch* showed significant changes only for PC2. (b) *S.ae* had larger leaves than *S.ch* at all sites and showed slightly increased plasticity in leaf size. (c) Leaves for both species increased in SLA towards lower elevations, and *S.ae* exhibited a greater increase than *S.ch*. (d) *S.ae* showed lower total photosynthetic performance ( $PI_{total}$ ) at lower elevations, while *S.ch* did not change.

397 Together, these results indicate statistically strong and contrasting patterns of morphological plasticity in  
398 these two species. *S.ae* exhibited reduced leaf investment with elevation, which was associated with reduced  
399 photosynthetic activity at lower elevations. By contrast, *S.ch* showed smaller reductions in leaf area and  
400 smaller changes in leaf investment across elevation, as well as lower and more consistent physiological  
401 activity.

402 To test whether genotypes responded differently across transplant sites within species, we tested for  
403 significant G $\times$ E underlying morphological plasticity. We found that both species exhibited significant  
404 differences among genotypes (**Table 1**), while significant G $\times$ E was only absent for PC2 in *S.ae*. Generally,  
405 this meant that genotypes varied greatly in their response to the four transplant sites, reflected by the high  
406 percentage of G $\times$ E attributed to changes in variance rather than differences among reaction norms (**Table 1**;  
407 **Fig S1**).



408 **Table 1:** Testing for G×E in leaf morphology using mixed effects models. F-ratio is shown for the fixed-effect of elevation, and  $\chi^2$   
 409 statistics presented from the likelihood ratio tests for the remaining random effects of genotype, genotype×elevation and block.

| Species     | PC  | Elevation                        | Genotype                          | Genotype×Elevation                | Block                            | % of G×E change in: |          |
|-------------|-----|----------------------------------|-----------------------------------|-----------------------------------|----------------------------------|---------------------|----------|
|             |     |                                  |                                   |                                   |                                  | Reaction norm       | Variance |
| <i>S.ae</i> | PC1 | $F_{3,9.0} = 9.28$ ; $P=0.0041$  | $\chi^2(1) = 196.84$ ; $P<0.0001$ | $\chi^2(10) = 36.53$ ; $P<0.001$  | $\chi^2(1) = 46.68$ ; $P<0.001$  | 6.89                | 93.11    |
|             | PC2 | $F_{3,8.5} = 2.84$ ; $P=0.1016$  | $\chi^2(1) = 224.14$ ; $P<0.0001$ | $\chi^2(10) = 14.14$ ; $P=0.1667$ | $\chi^2(1) = 56.22$ ; $P<0.001$  | 4.79                | 95.21    |
| <i>S.ch</i> | PC1 | $F_{3,10.8} = 4.18$ ; $P=0.0339$ | $\chi^2(1) = 672.14$ ; $P<0.0001$ | $\chi^2(10) = 62.049$ ; $P<0.001$ | $\chi^2(1) = 5.41$ ; $P=0.02$    | 10.08               | 89.92    |
|             | PC2 | $F_{3,8.4} = 6.67$ ; $P=0.0132$  | $\chi^2(1) = 304.91$ ; $P<0.0001$ | $\chi^2(10) = 49.35$ ; $P<0.001$  | $\chi^2(1) = 246.91$ ; $P<0.001$ | 7.6                 | 92.4     |

410

411

412 *Differential gene expression between transplant sites, genotypes and species*

413 Mapping of trimmed reads to the transcriptome references for each species resulted in a mapping rate of 73.4  
 414 to 97.3% (mean = 83.0%) among samples. Patterns of gene expression within each species reflected  
 415 differences between transplants sites and between genotypes (**Fig. S2**). In *S.ch*, the total number of  
 416 differentially expressed genes between transplant sites increased with increasing elevation. By contrast, *S.ae*  
 417 exhibited more differentially expressed genes as elevation decreased, with the greatest number of  
 418 differentially expressed genes at 1,000m (**Fig. S3**). Overall, the number of differentially expressed genes was  
 419 greater for *S.ae* (**Fig. S3**), which was reflected by stronger differences among the sampled genotypes, and  
 420 greater numbers of differentially expressed genes showing G×E interactions (**Fig. 7a**). In *S.ae*, the average  
 421 transcriptional change across all contrasts (between all genotypes or between all transplant sites) was 8%  
 422 greater as a result of genotypic differences than the environmental response and 9% greater than the  
 423 interaction between environment and genotype (G×E) ( $p < 0.001$ ,  $Z = -10.89$ ; **Fig. 7b**). However, in *S.ch* we  
 424 observed a contrasting pattern, with the average expression change resulting from G×E 6% and 8.5% greater  
 425 than genotypic and environmental responses respectively ( $p < 0.001$ ,  $Z = 25.04$ ; **Fig. 7b**). These results  
 426 suggest that a greater proportion of the transcriptome in *S.ae* showed transcriptional plasticity between  
 427 genotypes (G×E) than for *S.ch*.

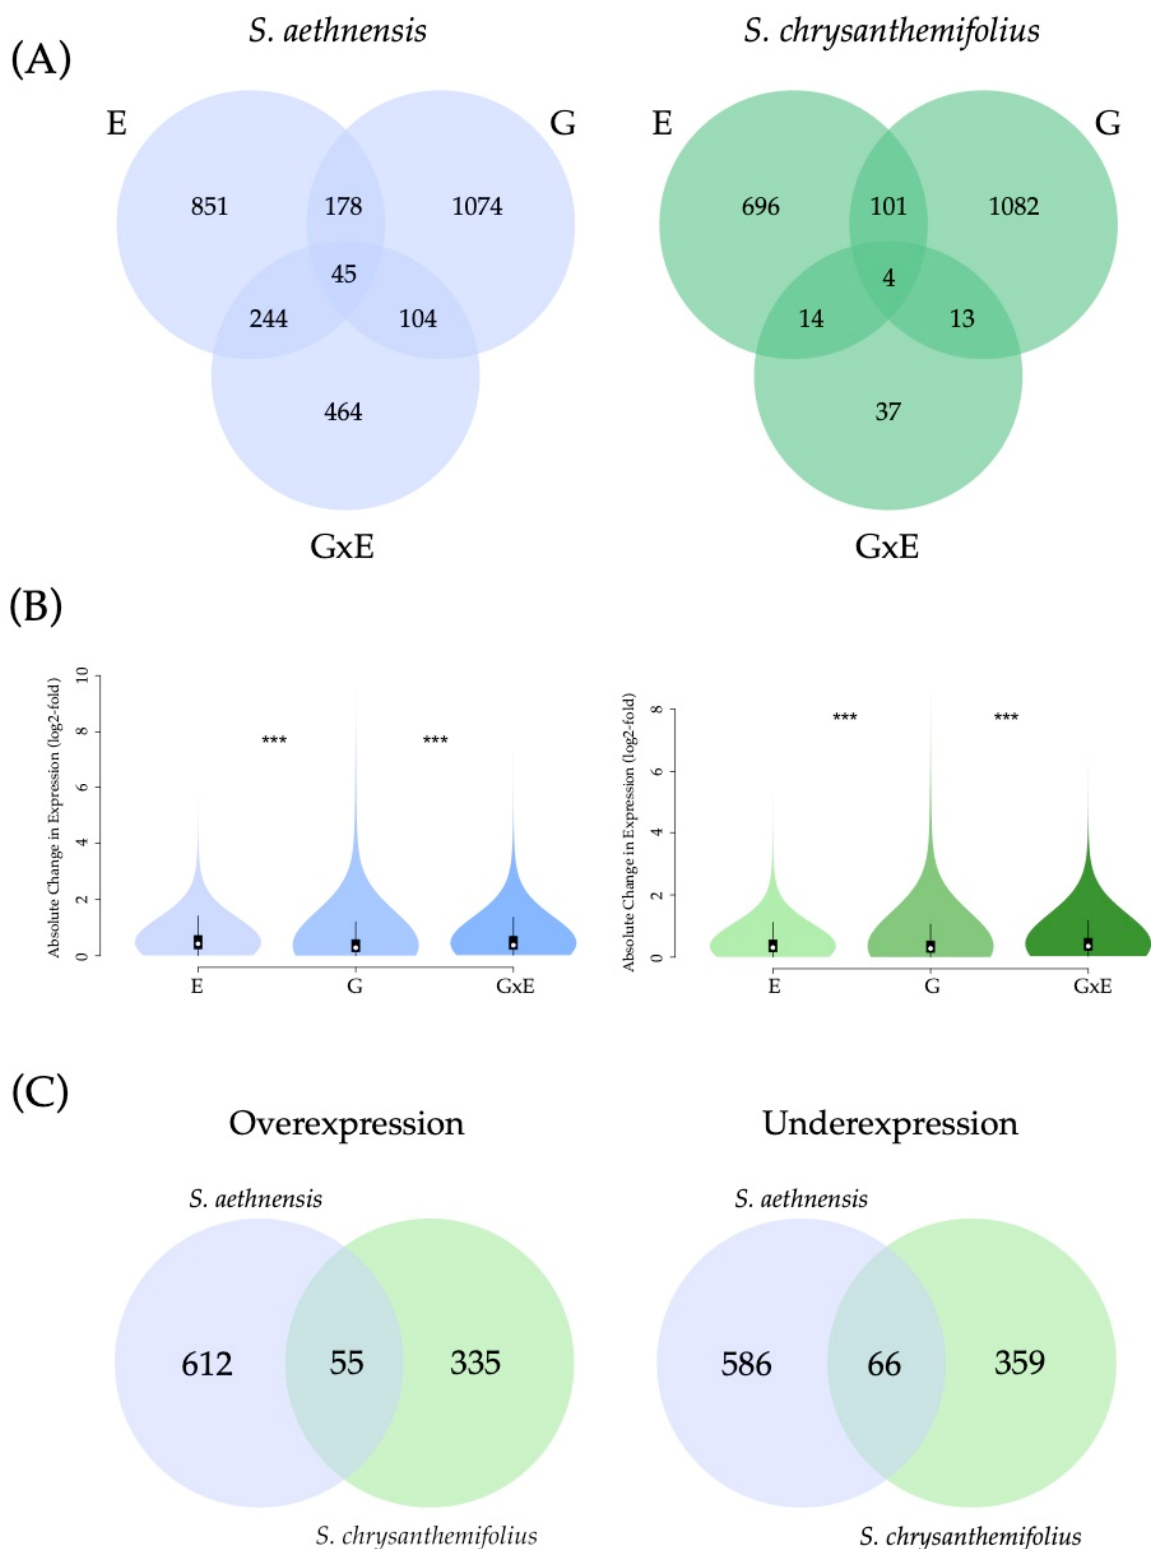

428 **Fig. 7** Contrasting patterns of gene expression between species. (a) Total numbers of differentially expressed genes ( $-2 < \log_2 \text{fc} > 2$ )  
 429 between genotypes (G), transplant sites (E) and interactions between genotype and environment (G×E). (b) Average expression  
 430 changes in response to G, E and G×E. Asterisks denote significant differences (Wilcoxon signed-rank test,  $p < 0.001$ ). (c)  
 431 Overlapping overexpressed and underexpressed genes between the home and furthest transplant site in each species.

432

433 A comparison of the genes that were differentially expressed between the home site and the most novel

434 environment (i.e., elevation extreme) for each species indicated very little overlap between the two species,  
435 with just 5.5% and 6.5% of overexpressed and underexpressed genes shared between species (**Fig. 7c**). This  
436 suggests independent genetic pathways underlie plastic responses to elevation in these two species. We  
437 plotted the expression profile of the ten genes in each species with the largest change in overexpression and  
438 underexpression between 2,000m and 500m. In each case we observed a contrasting pattern between the two  
439 species, with strong overexpression or underexpression in one species but a relatively unchanged expression  
440 profile in the other species (**Fig. 8**).

441 Functional enrichment analyses of differentially expressed genes between the transplant sites representing  
442 their home versus novel environmental conditions, revealed 38 significant GO terms in *S.ch* and 30 in *S.ae*.  
443 Comparing the significant terms between species revealed that only four functional categories of genes were  
444 shared (GO:0006412 translation, GO:0009637 response to blue light, GO:0009768 photosynthesis and  
445 GO:0000028 ribosomal small subunit assembly; **Tables S3** and **S4**). These data also suggest that the  
446 phenotypic response to elevational change in each species involves mostly different genetic pathways. In  
447 *S.ae*, GO terms indicated potential physiological changes to the leaf cuticle, including fatty acid biosynthesis,  
448 wax biosynthesis and cutin biosynthesis (**Table S3**). In *S.ch*, GO terms specifically involved responses to  
449 changing light conditions, including response to blue light, protein-chromophore linkage, light-harvesting in  
450 Photosystem I and response to high light intensity (**Table S4**).

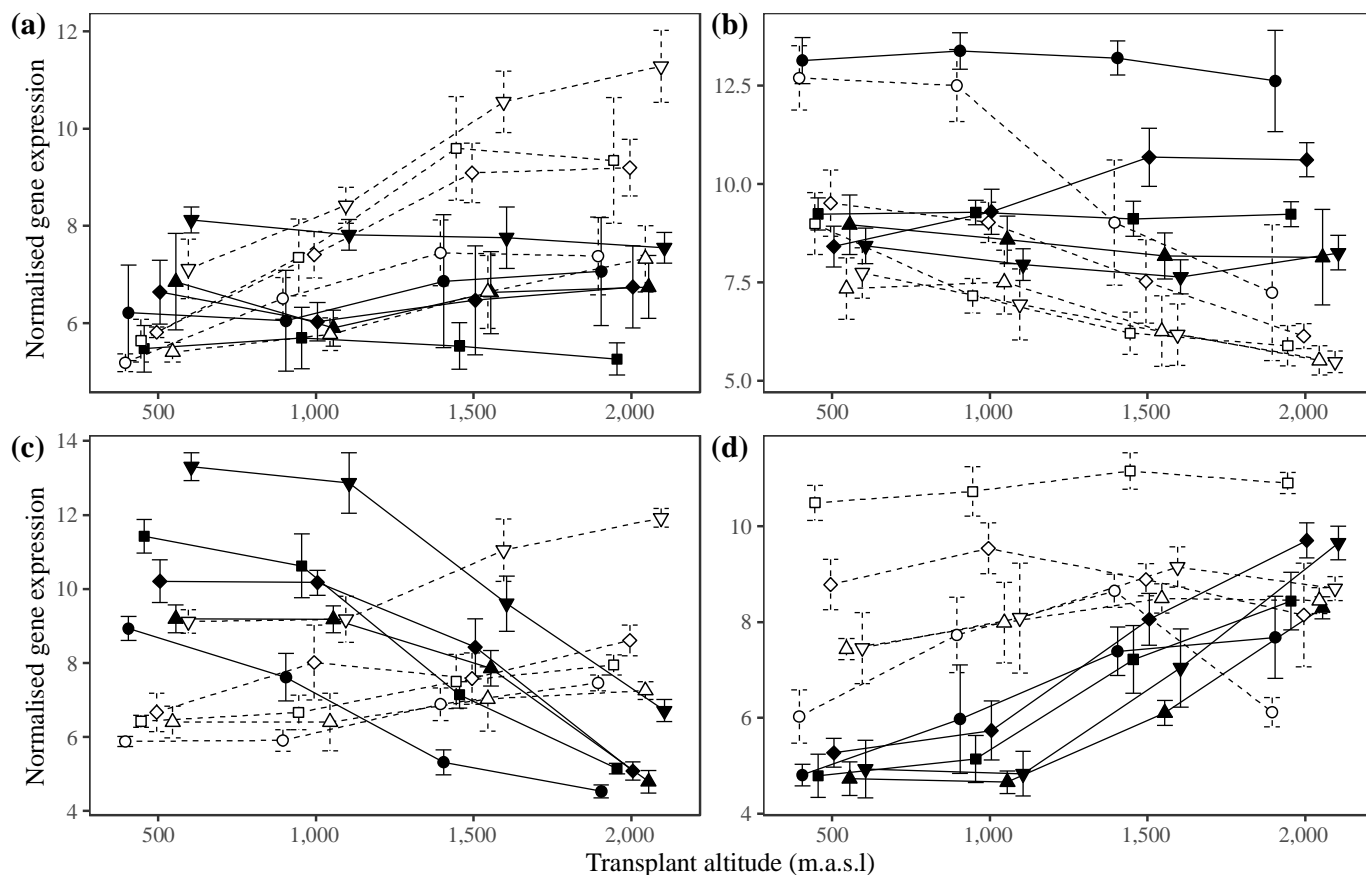

**Fig. 8** Normalised expression profiles across all transplant sites for *S.ch* (solid lines and circles) compared to *S.ae* (dashed lines and unfilled circles). This includes the five genes (represented by different shapes) that are most strongly underexpressed in *S.ae* (a), overexpressed in *S.ae* (b), and the five genes most strongly underexpressed in *S.ch* (c) and overexpressed in *S.ch* (d). Strong overexpression or underexpression in one species was reflected by little to no change in gene expression in the same gene for the other species.

## Discussion

In this study, we used extensive field transplants of cuttings (clones) from 79 genotypes to quantify the survival, growth, and responses at the phenotypic and gene expression levels for two closely related but ecologically divergent species to an elevation gradient. We tested how these two species differed in plasticity, and characterised genotypic variation in plasticity within and outside each species' elevational range. We predicted that due to strong stabilising selection and a small geographic range, the more ecologically restricted species, *S. aethnensis* (*S.ae*), would perform poorly away from its home site, which would be reflected by reduced plastic responses overall and reduced genetic variation in plasticity. Conversely, we predicted that because *S. chrysanthemifolius* (*S.ch*) occupies a range of habitats with higher spatial and temporal environmental variation, *S.ch* would show greater plasticity and more genetic variation in plasticity, which would help this species to maintain performance across an elevational gradient.

469 In support of our predictions, we found that *S.ae* showed reduced survival (**Fig. 4a**) and photosynthetic  
470 activity (**Fig. 6d**) away from its home site after summer, while *S.ch* showed low but consistent photosynthetic  
471 activity across the elevational range, and only reduced performance after winter at the site furthest from its  
472 home range. Against our predictions, both species showed similar levels of plasticity in morphology across  
473 the elevational gradient, but morphological plasticity occurred in different phenotypic directions for the two  
474 species (**Fig. 5** and **Fig. 6a**). This suggests that following adaptation morphological plasticity might be  
475 restricted to certain areas of phenotypic space, which is different for populations adapting to contrasting  
476 habitats. Similarly, gene expression responses to the elevational gradient involved highly distinct genetic  
477 pathways for the two species (**Figs. 7-8**; for *S.ch*, genes underlying the sensing and response to light; for *S.ae*,  
478 the composition of the leaf cuticle). Surprisingly, in both species we identified genetic variation in plasticity  
479 as G×E underlying plastic responses (Table 1), but a stronger pattern of G×E in gene expression for *S.ae*  
480 compared to *S.ch* (**Fig. 7**). These results indicate that adaptation to their contrasting habitats has determined  
481 the gene expression and morphological pathways each species is able to access when exposed to  
482 environmental variation.

483 Cuttings used for the field transplants in this study were from adult individuals in the wild, which suggests  
484 that because they successfully bypassed selection that removed other individuals from the population, they  
485 likely represent genotypes that are well adapted to their local environments. However, the plastic responses  
486 shown by cuttings from these genotypes, as well as representing only a subset of the genotypes available  
487 from seed produced in the natural populations, are likely to reflect many developmental decisions that have  
488 already been made by genotypes in earlier life that shape their responses to environmental variation (Morey  
489 and Reznick 2000; Weinig and Delph 2001). To better understand how populations of short-lived species can  
490 respond to environmental change, it will be important to compare patterns of plasticity for segregating  
491 genetic variation versus established genotypes or seeds produced in the wild, which will determine how  
492 plasticity emerges in natural populations, and how they may respond to environmental change.

### 493 *Adaptation influences plastic responses*

494 Our data suggest that *S.ae* and *S.ch* have specialised to contrasting habitats, which has created differences  
495 between the species in the level and direction of plastic responses to conditions outside their natural habitats,  
496 even though these species are very closely related (Taylor and Aarssen 1988; Emery et al. 1994; Ho and  
497 Zhang 2018). Where a previous study indicated that under controlled conditions there were minimal  
498 differences in the transcriptome of each species (Chapman et al. 2013), our field studies revealed that even  
499 within common gardens, each species has evolved a distinct transcriptional regime. These contrasting results  
500 may be due to greater environmental heterogeneity under field conditions, or the greater number of

501 transcriptomes and hence power to detect differentially expressed genes in the present study.

502 It has been demonstrated that variation in transcriptomic plasticity between species, i.e. greater changes in  
503 gene expression of key genes and networks, correlates with the ability to maintain fitness by matching the  
504 phenotype to environmental changes (Wellband and Heath 2017). While the extent of transcriptomic  
505 plasticity was similar between species, large changes in the expression of particular genes in one species was  
506 often contrasted by small or non-existent changes in the other species, suggesting stress outside their natural  
507 range results in a species-specific plastic response and inability to converge on similar expression profiles.  
508 Such contrasting responses for the two species suggest that adaptation to their local environment, rather than  
509 phylogenetic history, has a greater bearing on transcriptomic plasticity. Transcriptomic studies in other plant  
510 species have also reported that the local environment is a major determinant of transcriptomic changes when  
511 transplanted (Akman et al. 2016).

512 Plasticity in genetic pathways within *Senecio* has previously been observed in the mating systems and the  
513 flexibility of the self-incompatibility (SI) phenotype, where the strength of SI can vary to assure reproduction  
514 (Brennan and Hiscock 2010). While we identified hundreds of loci in each species showing a plastic  
515 response, there was clear evidence for changes in a small number of functional suites of genes that were  
516 highly distinct between the two species. SC showed the greatest change in genes relating to photosynthesis,  
517 light response and circadian rhythm, which are likely a response to the changing temperature and light  
518 intensity with increasing altitude (Beis and Patakas 2012). By contrast, the greatest changes observed in SA  
519 were associated with the plant cuticle, including the biosynthesis of cutin, waxes and fatty acids. Changes in  
520 the cuticle could reflect a response to various biotic and abiotic stressors at the lower altitude, such as  
521 pathogens and water loss (Serrano et al. 2014). This was reflected by consistent photosynthetic activity  
522 across all elevations in *S.ch*, suggesting a broad ecological range where plasticity could maintain growth and  
523 survival. By contrast, transplanting *S.ae* away from its home elevation resulted in high mortality, and rapid  
524 reductions in leaf allocation and photosynthetic activity. This supports our predictions that the species with  
525 the smallest ecological range will show higher specialisation, which would reduce its tolerance to  
526 environmental variation. Theory predicts that plants growing in harsh environments will show reduced  
527 plasticity, as the cost of a mismatch with the environment is greater (Alpert and Simms 2002) and there is  
528 compelling evidence in other high-elevation plant species that specialisation does reduce plasticity, in for  
529 instance flowering time (Schmid et al. 2017) and morphology (Emery et al. 1994). Such a narrow sensitivity  
530 to environmental variation suggests that adaptation to the high elevation environment has resulted in *S.ae*  
531 having a reduced ability to respond adaptively to cues associated with high temperatures (Weinig 2000).  
532 Therefore, increased temperatures created by climate change are likely to affect the persistence of this

533 species even at high elevations on Mt. Etna.

534 Understanding how plasticity evolves is important for understanding how species can respond to  
535 environmental variation (Bradshaw 1965; Baythavong and Stanton 2010). In our results, such distinct  
536 sensitivities of closely related species to the same environmental variation are important for predicting  
537 ecosystem-level responses to environmental change because they will likely lead to different responses.  
538 However, different taxa can evolve different plastic responses, even when they inhabit similar environments  
539 (Puijalon and Bornette 2004), suggesting that to better understand ecosystem-level responses to  
540 environmental change we need to first identify how plastic responses to environmental variation arise in  
541 different species, and at what spatial/temporal scale. Studies comparing plasticity among multiple species are  
542 not common, but suggest that the direction of plastic responses often differs among species, and that such  
543 differences are likely important for species persisting in their particular habitat (Marshall et al. 1985; Huang  
544 et al. 2009). Fine-scale plasticity may be required for adapting to environments that impose strong stabilising  
545 selection (e.g., the alpine environment), but for species that have adapted to such environments, strong  
546 stabilising selection will likely hinder their ability to track large variation in the environment (Emery et al.  
547 1994; Baythavong 2011). Future studies should focus on understanding how plasticity arises, and identify  
548 whether such plasticity will be adaptive in response to future environmental change.

#### 549 *Genotype-by-environment interactions underlying plastic responses*

550 In both *Senecio* species we found significant patterns of G×E interactions underlying plastic responses to the  
551 elevational gradient, which suggests a rapid evolutionary response of plasticity to shifts in environmental  
552 variation is possible. At the level of gene expression, prevalent G×E interactions in SA suggests greater  
553 genetic variance in the response to the environment, which potentially a reflection of the narrower and more  
554 homogenous range of SA and the subsequent lack of a selected response. However, with only three  
555 genotypes per species, stronger G×E in gene expression for *S.ae* could be an artefact of sampling, which  
556 future studies should look to explore. Consistent with other studies (e.g., Friedman et al. 2019), G×E patterns  
557 in leaf morphology were largely created by changes in scale (amount of variance among genotypes) across  
558 the elevational gradient, rather than by genotypic-specific (i.e., crossing of reaction norms) responses to the  
559 environment. If the G×E interaction underlying plastic changes in phenotype and gene expression is  
560 maladaptive (i.e., the more plastic genotypes have lower fitness), we may be overestimating the potential for  
561 natural populations to respond positively to environmental change (Acasuso-Rivero et al. 2019). Future work  
562 should more closely link patterns of G×E with fitness variation to understand whether there is genetic  
563 variation for adaptive plasticity, even if the overall response of the species is a net reduced performance. If  
564 such genetic variation exists, selection for adaptively plastic genotypes could lead to the rapid evolution of

565 novel forms of adaptive plasticity (Sultan 2004; Wadgyamar et al. 2018). Whether such evolution of adaptive  
566 plasticity requires a crossing of reaction norms, or whether selection can act upon differences in scale needs  
567 to be tested. Therefore, associating genotypes that vary in their level of plasticity with fitness across  
568 environmental variation would test whether more specialised genotypes determine the level of plasticity, and  
569 the conditions under which plasticity is adaptive.

570

## 571 **Acknowledgements**

572 We are very grateful to Pianta Faro for providing us with the facilities to propagate plants, and to G. Riggio  
573 and P. Maugeri for allowing us access to transplant sites. This research was supported by NERC grant  
574 NE/P001793/1 awarded to JB, SH and DF.

575

## 576 **Authors' contributions**

577 JB, SH, GW, SCozzolino, AC and DF designed the study. GW, AC and SCatara conducted the glasshouse  
578 and fieldwork. JC and BN extracted RNA and handled the transcriptome data. MP measured chlorophyll  
579 fluorescence, and VV grew plants and measured physiological differences between the two species. GW and  
580 JC analysed the data and wrote the manuscript with important contributions from all authors. All authors  
581 gave final approval for publication.

582

## 583 **References**

- 584 Acasuso-Rivero, C., C. J. Murren, C. D. Schlichting, and U. K. Steiner. 2019. Adaptive phenotypic plasticity  
585 for life-history and less fitness-related traits. *Proceedings of the Royal Society B-Biological Sciences*  
586 286.
- 587 Akman, M., J. E. Carlson, K. E. Holsinger, and A. M. Latimer. 2016. Transcriptome sequencing reveals  
588 population differentiation in gene expression linked to functional traits and environmental gradients  
589 in the South African shrub *Protea repens*. *New Phytologist* 210:295-309.
- 590 Alexa, A., and J. Rahnenfuhrer. 2019. topGO: enrichment analysis for gene ontology, version v.2.3.6.R  
591 package.
- 592 Alpert, P., and E. L. Simms. 2002. The relative advantages of plasticity and fixity in different environments:  
593 when is it good for a plant to adjust? *Evolutionary Ecology* 16:285-297.
- 594 Armenteros, J. J. A., K. D. Tsirigos, C. K. Sonderby, T. N. Petersen, O. Winther, S. Brunak, G. von Heijne et  
595 al. 2019. SignalP 5.0 improves signal peptide predictions using deep neural networks. *Nature*



- 596 Biotechnology 37:420-423.
- 597 Bates, D., M. Machler, B. M. Bolker, and S. C. Walker. 2015. Fitting linear mixed-effects models using  
598 lme4. *Journal of Statistical Software* 67:1-48.
- 599 Baythavong, B. S. 2011. Linking the spatial scale of environmental variation and the evolution of phenotypic  
600 plasticity: selection favors adaptive plasticity in fine-grained environments. *The American Naturalist*  
601 178:75-87.
- 602 Baythavong, B. S., and M. L. Stanton. 2010. Characterizing Selection on Phenotypic Plasticity in Response  
603 to Natural Environmental Heterogeneity. *Evolution* 64:2904-2920.
- 604 Beis, A., and A. Patakas. 2012. Relative contribution of photoprotection and anti-oxidative mechanisms to  
605 differential drought adaptation ability in grapevines. *Environmental and Experimental Botany* 78:173-  
606 183.
- 607 Bell, G., and A. Gonzalez. 2009. Evolutionary rescue can prevent extinction following environmental  
608 change. *Ecology Letters* 12:942-948.
- 609 Benjamini, Y., and Y. Hochberg. 1995. Controlling the False Discovery Rate: A Practical and Powerful  
610 Approach to Multiple Testing. *Journal of the Royal Statistical Society. Series B (Methodological)*  
611 57:289-300.
- 612 Bradshaw, A. D. 1965. Evolutionary significance of phenotypic plasticity in plants. *Advances in Genetics*  
613 13:115-155.
- 614 Brennan, A. C., and S. J. Hiscock. 2010. Expression and inheritance of sporophytic self-incompatibility in  
615 synthetic allohexaploid *Senecio cambrensis* (Asteraceae). *New Phytologist* 186:251-261.
- 616 Bryant, D. M., K. Johnson, T. DiTommaso, T. Tickle, M. B. Couger, D. Payzin-Dogru, T. J. Lee et al. 2017.  
617 A Tissue-Mapped Axolotl De Novo Transcriptome Enables Identification of Limb Regeneration  
618 Factors. *Cell Reports* 18:762-776.
- 619 Bylesjo, M., V. Segura, R. Y. Soolanayakanahally, A. M. Rae, J. Trygg, P. Gustafsson, S. Jansson et al.  
620 2008. LAMINA: a tool for rapid quantification of leaf size and shape parameters. *BMC Plant Biology*  
621 8.
- 622 Chapman, M. A., S. J. Hiscock, and D. A. Filatov. 2013. Genomic divergence during speciation driven by  
623 adaptation to altitude. *Molecular Biology and Evolution* 30:2553-2567.
- 624 —. 2016. The genomic bases of morphological divergence and reproductive isolation driven by ecological  
625 speciation in *Senecio* (Asteraceae). *Journal of Evolutionary Biology* 29:98-113.
- 626 Charmantier, A., R. H. McCleery, L. R. Cole, C. Perrins, L. E. B. Kruuk, and B. C. Sheldon. 2008. Adaptive  
627 phenotypic plasticity in response to climate change in a wild bird population. *Science* 320:800-803.
- 628 Chevin, L. M., R. Gallet, R. Gomulkiewicz, R. D. Holt, and S. Fellous. 2013. Phenotypic plasticity in  
629 evolutionary rescue experiments. *Philosophical Transactions of the Royal Society of London Series*  
630 B-Biological Sciences 368:1-12.
- 631 Chevin, L. M., and A. A. Hoffmann. 2017. Evolution of phenotypic plasticity in extreme environments.

- 332 Philosophical Transactions of the Royal Society of London Series B-Biological Sciences 372.
- 333 Chevin, L. M., and R. Lande. 2011. Adaptation to marginal habitats by evolution of increased phenotypic  
334 plasticity. *Journal of Evolutionary Biology* 24:1462–1476.
- 335 Chevin, L. M., R. Lande, and G. M. Mace. 2010. Adaptation, plasticity, and extinction in a changing  
336 environment: towards a predictive theory. *PLoS Biology* 8:e1000357.
- 337 Cockerham, C. C. 1963. Estimation of genetic variances, Pages 53-94 in W. D. Hanson, and H. F. Robertson,  
338 eds. *Statistical genetics and plant breeding*. Washington DC, USA: National Academy of Sciences -  
339 National Research Council.
- 340 Colicchio, J. M., P. J. Monnahan, J. K. Kelly, and L. C. Hileman. 2015. Gene expression plasticity resulting  
341 from parental leaf damage in *Mimulus guttatus*. *New Phytologist* 205:894-906.
- 342 Dal Santo, S., S. Zenoni, M. Sandri, G. De Lorenzis, G. Magris, E. De Paoli, G. Di Gaspero et al. 2018.  
343 Grapevine field experiments reveal the contribution of genotype, the influence of environment and  
344 the effect of their interaction (GxE) on the berry transcriptome. *Plant Journal* 93:1143-1159.
- 345 de Jong, G. 2005. Evolution of phenotypic plasticity: patterns of plasticity and the emergence of ecotypes.  
346 *New Phytologist* 166:101-117.
- 347 Debat, V., and P. David. 2001. Mapping phenotypes: canalization, plasticity and developmental stability.  
348 *Trends in Ecology & Evolution* 16:555-561.
- 349 Emery, R. J. N., C. C. Chinnappa, and J. G. Chmielewski. 1994. Specialization, Plant Strategies, and  
350 Phenotypic Plasticity in Populations of *Stellaria longipes* Along an Elevational Gradient.  
351 *International Journal of Plant Sciences* 155:203-219.
- 352 Emms, D. M., and S. Kelly. 2019. OrthoFinder: phylogenetic orthology inference for comparative genomics.  
353 bioRxiv:466201.
- 354 Friedman, J., T. E. Middleton, and M. J. Rubin. 2019. Environmental heterogeneity generates intrapopulation  
355 variation in life-history traits in an annual plant. *New Phytologist* 224:1171-1183.
- 356 Fusco, G., and A. Minelli. 2010. Phenotypic plasticity in development and evolution: facts and concepts.  
357 Introduction. *Philosophical Transactions of the Royal Society of London Series B-Biological*  
358 *Sciences* 365:547-556.
- 359 Ghalambor, C. K., J. K. McKay, S. P. Carroll, and D. N. Reznick. 2007. Adaptive versus non-adaptive  
360 phenotypic plasticity and the potential for contemporary adaptation in new environments. *Functional*  
361 *Ecology* 21:394-407.
- 362 Gibson, G., and G. Wagner. 2000. Canalization in evolutionary genetics: a stabilizing theory? *Bioessays*  
363 22:372-380.
- 364 Haas, B. J., A. Papanicolaou, M. Yassour, M. Grabherr, P. D. Blood, J. Bowden, M. B. Couger et al. 2013.  
365 De novo transcript sequence reconstruction from RNA-seq using the Trinity platform for reference  
366 generation and analysis. *Nature Protocols* 8:1494-1512.
- 367 Herman, J. J., H. G. Spencer, K. Donohue, and S. E. Sultan. 2014. How Stable 'Should' Epigenetic

- 368 Modifications Be? Insights from Adaptive Plasticity and Bet Hedging. *Evolution* 68:632-643.
- 369 Ho, W. C., and J. Z. Zhang. 2018. Evolutionary adaptations to new environments generally reverse plastic  
370 phenotypic changes. *Nature Communications* 9:1-11.
- 371 Højsgaard, S. 2017. pbkrtest: Parametric Bootstrap and Kenward Roger Based Methods for Mixed Model  
372 Comparison, <https://cran.r-project.org/web/packages/pbkrtest/index.html>.
- 373 Huang, Y. X., X. Y. Zhao, H. X. Zhang, G. Huang, Y. Y. Luo, and W. Japhet. 2009. A comparison of  
374 phenotypic plasticity between two species occupying different positions in a successional sequence.  
375 *Ecological Research* 24:1335-1344.
- 376 Johnson, M. T. J. 2007. Genotype-by-environment interactions leads to variable selection on life-history  
377 strategy in Common Evening Primrose (*Oenothera biennis*). *Journal of Evolutionary Biology* 20:190-  
378 200.
- 379 Josephs, E. B. 2018. Determining the evolutionary forces shaping G x E. *New Phytologist* 219:31-36.
- 380 Kellermann, V., A. A. Hoffmann, J. Overgaard, V. Loeschcke, and C. M. Sgrò. 2018. Plasticity for  
381 desiccation tolerance across *Drosophila* species is affected by phylogeny and climate in complex  
382 ways. *Proceedings of the Royal Society B-Biological Sciences* 285.
- 383 Kramer, D. M., G. Johnson, O. Kiirats, and G. E. Edwards. 2004. New fluorescence parameters for the  
384 determination of QA redox state and excitation energy fluxes. *Photosynthesis Research* 79:209-218.
- 385 Kulkarni, S. S., I. Gomez-Mestre, C. L. Moskalik, B. L. Storz, and D. R. Buchholz. 2011. Evolutionary  
386 reduction of developmental plasticity in desert spadefoot toads. *Journal of Evolutionary Biology*  
387 24:2445-2455.
- 388 Lafond-Lapalme, J., M. O. Duceppe, S. R. Wang, P. Moffett, and B. Mimee. 2017. A new method for  
389 decontamination of de novo transcriptomes using a hierarchical clustering algorithm. *Bioinformatics*  
390 33:1293-1300.
- 391 Lande, R. 2009. Adaptation to an extraordinary environment by evolution of phenotypic plasticity and  
392 genetic assimilation. *Journal of Evolutionary Biology* 22:1435-1446.
- 393 Lenth, R. V. 2019. emmeans: Estimated Marginal Means, aka Least-Squares Means, [https://CRAN.R-  
394 project.org/package=emmeans](https://CRAN.R-project.org/package=emmeans).
- 395 Lortie, C. J., and L. W. Aarssen. 1996. The specialization hypothesis for phenotypic plasticity in plants.  
396 *International Journal of Plant Sciences* 157:484-487.
- 397 Love, M. I., W. Huber, and S. Anders. 2014. Moderated estimation of fold change and dispersion for RNA-  
398 seq data with DESeq2. *Genome Biology* 15.
- 399 Marshall, D. L., N. L. Fowler, and D. A. Levin. 1985. Plasticity in Yield Components in Natural-Populations  
700 of Three Species of *Sesbania*. *Ecology* 66:753-761.
- 701 Morey, S., and D. Reznick. 2000. A comparative analysis of plasticity in larval development in three species  
702 of spadefoot toads. *Ecology* 81:1736-1749.
- 703 Nussey, D. H., E. Postma, P. Gienapp, and M. E. Visser. 2005. Selection on heritable phenotypic plasticity in

- 704 a wild bird population. *Science* 310:304-306.
- 705 Oostra, V., M. Saastamoinen, B. J. Zwaan, and C. W. Wheat. 2018. Strong phenotypic plasticity limits  
706 potential for evolutionary responses to climate change. *Nature Communications* 9:1-11.
- 707 Osborne, O. G., T. E. Batstone, S. J. Hiscock, and D. A. Filatov. 2013. Rapid speciation with gene flow  
708 following the formation of Mt. Etna. *Genome Biology and Evolution* 5:1704-1715.
- 709 Patro, R., G. Duggal, M. I. Love, R. A. Irizarry, and C. Kingsford. 2017. Salmon provides fast and bias-  
710 aware quantification of transcript expression. *Nature Methods* 14:417.
- 711 Pigliucci, M. 2005. Evolution of phenotypic plasticity: where are we going now? *Trends in Ecology &*  
712 *Evolution* 20:481-486.
- 713 Pigliucci, M., K. Cammell, and J. Schmitt. 1999. Evolution of phenotypic plasticity a comparative approach  
714 in the phylogenetic neighbourhood of *Arabidopsis thaliana*. *Journal of Evolutionary Biology* 12:779-  
715 791.
- 716 Pujalon, S., and G. Bornette. 2004. Morphological variation of two taxonomically distant plant species along  
717 a natural flow velocity gradient. *New Phytologist* 163:651-660.
- 718 R Core Team. 2019 R: A language and environment for statistical computing, version 3.6.1. R Foundation  
719 for Statistical Computing, Vienna, Austria.
- 720 Rockman, M. V., and L. Kruglyak. 2006. Genetics of global gene expression. *Nature Reviews Genetics*  
721 7:862-872.
- 722 Schlichting, C. D. 1986. The Evolution of Phenotypic Plasticity in Plants. *Annual Review of Ecology and*  
723 *Systematics* 17:667-693.
- 724 Schmid, S. F., J. Stocklin, E. Hamann, and H. Kesselring. 2017. High-elevation plants have reduced  
725 plasticity in flowering time in response to warming compared to low-elevation congeners. *Basic and*  
726 *Applied Ecology* 21:1-12.
- 727 Serrano, M., F. Coluccia, M. Torres, F. L'Haridon, and J.-P. Métraux. 2014. The cuticle and plant defense to  
728 pathogens. *Frontiers in plant science* 5:274.
- 729 Shaw, J. R., T. H. Hampton, B. L. King, A. Whitehead, F. Galvez, R. H. Gross, N. Keith et al. 2014. Natural  
730 Selection Canalizes Expression Variation of Environmentally Induced Plasticity-Enabling Genes.  
731 *Molecular Biology and Evolution* 31:3002-3015.
- 732 Sultan, S. E. 2004. Promising directions in plant phenotypic plasticity. *Perspectives in Plant Ecology*  
733 *Evolution and Systematics* 6:227-233.
- 734 Taylor, D. R., and L. W. Aarssen. 1988. An Interpretation of Phenotypic Plasticity in *Agropyron repens*  
735 (Graminae). *American Journal of Botany* 75:401-413.
- 736 Tsimilli-Michael, M., and R. J. Strasser. 2013. Biophysical Phenomics: Evaluation of the Impact of  
737 Mycorrhization with *Piriformospora indica*, Pages 173-190 in A. Varma, G. Kost, and R. Oelmüller,  
738 eds. *Piriformospora indica: Sebaciales and their biotechnological applications*. Berlin, Germany,  
739 Springer.

- 740 Via, S. 1993. Adaptive phenotypic plasticity: target or by-product of selection in a variable environment?  
741 *The American Naturalist* 142:352-365.
- 742 Via, S., R. Gomulkiewicz, G. De Jong, S. M. Scheiner, C. D. Schlichting, and P. H. Van Tienderen. 1995.  
743 Adaptive phenotypic plasticity: consensus and controversy. *Trends in Ecology & Evolution* 10:212-  
744 217.
- 745 Wadgymar, S. M., R. M. Mactavish, and J. B. Anderson. 2018. Transgenerational and within-generation  
746 plasticity in response to climate change: insights from a manipulative field experiment across an  
747 elevational gradient. *The American Naturalist* 192:698-714.
- 748 Weinig, C. 2000. Plasticity versus canalization: Population differences in the timing of shade-avoidance  
749 responses. *Evolution* 54:441-451.
- 750 Weinig, C., and L. F. Delph. 2001. Phenotypic plasticity early in life constrains developmental responses  
751 later. *Evolution* 55:930-936.
- 752 Wellband, K. W., and D. D. Heath. 2017. Plasticity in gene transcription explains the differential  
753 performance of two invasive fish species. *Evolutionary Applications* 10:563-576.
- 754
