1 **Adaptive divergence generates distinct plastic responses in two closely related *Senecio* species**

2 *Greg M. Walter*<sup>1,2\*</sup>, *James Clark*<sup>1,3</sup>, *Antonia Cristaudo*<sup>4</sup>, *Bruno Nevado*<sup>3</sup>, *Stefania Catara*<sup>4</sup>, *Momchil Paunov*<sup>5</sup>,  
3 *Violeta Velikova*<sup>6</sup>, *Dmitry Filatov*<sup>3</sup>, *Salvatore Cozzolino*<sup>7</sup>, *Simon J. Hiscock*<sup>3</sup> and *Jon R. Bridle*<sup>1,8</sup>

4 <sup>1</sup>University of Bristol, School of Biological Sciences, Bristol BS8 1TQ, UK

5 <sup>2</sup>Current address: Monash University, School of Biological Sciences, Melbourne 3800, Australia

6 <sup>3</sup>University of Oxford, Department of Plant Sciences, Oxford, OX1 3RB, UK

7 <sup>4</sup>University of Catania, Department of Biological, Geological and Environmental Sciences, Catania 95128,  
8 Italy

9 <sup>5</sup>Sofia University St. Kliment Ohridski, Faculty of Biology, Sofia 1164, Bulgaria

10 <sup>6</sup>Bulgarian Academy of Sciences, Institute of Plant Physiology and Genetics, Sofia 1113, Bulgaria

11 <sup>7</sup>University of Naples Federico II, Department of Biology, Naples 80126, Italy

12 <sup>8</sup>Current address: University College London, Department of Genetics, Evolution and Environment, London  
13 WC1E 6BT, UK

14

15 \* Corresponding Author: Greg M. Walter

16 Email: [greg.walter@monash.edu](mailto:greg.walter@monash.edu)

17

18

19 **Abstract**

20 Organisms rely on plasticity to track environmental variation within their native range. However, it remains  
21 unclear how adaptation and plasticity interact, and how adaptive divergence affects the evolution of  
22 plasticity. To test for variation in plastic responses among two closely related but ecologically divergent  
23 ragwort species (*Senecio*, Asteraceae), we sampled c.40 genotypes of each species from natural populations.  
24 We then transplanted multiple clones of each genotype into four field sites along an elevational gradient  
25 representing each species' native range, the edge of their range, and conditions outside their native range. At  
26 each transplant site, we quantified survival, growth, leaf investment, leaf morphology, chlorophyll  
27 fluorescence and gene expression. Both species performed better at their home sites, but the high elevation  
28 species showed lower tolerance to conditions outside its range than the low elevation species, suggesting  
29 stronger specialisation to the high elevation habitat. The two species also differed substantially in the  
30 direction of phenotypic and gene expression change across elevation, suggesting that distinct plastic  
31 responses have rapidly evolved in these two species. Adaptive divergence has led to the evolution of distinct  
32 plastic responses to environmental variation with distinct genomic architectures, despite these two species  
33 having shared a recent common ancestry.

34

35 **Keywords:** adaptation, differential gene expression, environmental sensitivity, evolutionary history,  
36 genotype-by-environment interactions, phenotypic plasticity, physiological plasticity, specialisation

37

## 38 **Introduction**

39 The resilience of natural populations and communities to novel or changing environments relies on the ability  
40 of genotypes to adjust their phenotype to track local conditions (Chevin et al. 2010). Phenotypic plasticity  
41 generates different phenotypes from the same genotype depending on the environment to which it is exposed  
42 (Via et al. 1995; Ghalambor et al. 2007; Charmantier et al. 2008). The ability for plasticity to track  
43 environmental variation is shaped by selection within environments routinely experienced (Ghalambor et al.  
44 2007). Plasticity therefore evolves to buffer populations in response only to particular environmental regimes  
45 (Bradshaw 1965; Schlichting 1986; Baythavong and Stanton 2010), which can increase ecological  
46 specialisation when populations adapt to highly predictable environments (Poisot et al. 2011). Characterising  
47 plasticity in closely related, but ecologically divergent species can test to what extent adaptive divergence  
48 and ecological speciation is also associated with divergence in phenotypic plasticity.

49 The effect of adaptation on the nature of plastic responses will depend on how plasticity and selection  
50 interact (de Jong 2005). Phylogenetic relatedness (Pigliucci et al. 1999; Kellermann et al. 2018), ecology  
51 (Kulkarni et al. 2011) and the predictability of the environment (Oostra et al. 2018) can determine the nature  
52 and amount of variation in plastic responses. We would predict that contrasting environments select for  
53 different forms and different magnitudes of plasticity, but it is not known to what extent a shared common  
54 ancestry will constrain such divergence in plasticity. We would also predict that plasticity can maintain  
55 fitness within a narrower range of environmental variation in species that are more specialised to a particular  
56 environment, reflecting a narrower range of ecological tolerances in such species (Lortie and Aarssen 1996;  
57 Debat and David 2001). However, few studies have assessed whether adaptation to contrasting environments  
58 causes not only adaptive divergence, but also divergence in plastic responses when exposed to the same  
59 environmental variation.

60 Plasticity can evolve where genotypes vary in their level of plasticity (Lande 2009; Chevin and Lande 2011).  
61 Genotypes that vary in their sensitivity to environmental variation show genotype-specific responses  
62 (reaction norms) that reflect genotype-by-environment interactions ( $G \times E$ ) underlying plastic responses (de  
63 Jong 2005; Pigliucci 2005; Josephs 2018). However, strong stabilising selection in highly predictable  
64 environments can lead to reduced genetic variation in plasticity (Oostra et al. 2018). By contrast, populations  
65 adapted to habitats that are more spatially or temporally variable are expected to be less predictable, which  
66 should maintain genetic variation in plasticity and increase their potential for the evolution of plasticity in  
67 response to future novel environments (Chevin et al. 2010). Characterising patterns of  $G \times E$  for a range of  
68 naturally occurring genotypes can therefore predict the likely rate and trajectory of evolutionary responses in  
69 subsequent generations (Via 1993; Chevin and Hoffmann 2017).

70 Assaying variation in gene expression across environments can reveal key aspects of the genomic basis of  
71 plasticity. If allelic (sequence changes in regulatory genes) or epiallelic (e.g. DNA methylation, chromatin  
72 remodelling, post-transcriptional modifications) variation underlying trait plasticity becomes fixed during  
73 adaptive divergence, limits to plasticity may arise (Gibson and Wagner 2000; Shaw et al. 2014; Oostra et al.  
74 2018). Highly predictable environments will reduce genetic variation in plasticity through stabilising  
75 selection acting either on the genetic regulators (e.g. transcription factors) or long-term epiallelic changes,  
76 such as transgenerational DNA methylation (Colicchio et al. 2015; Oostra et al. 2018). If such stabilising  
77 selection varies among environments, divergence in phenotypic plasticity will occur. Determining the gene  
78 expression profiles for closely related but ecologically divergent species can therefore reveal the effect of  
79 adaptive divergence on the genomic basis of plasticity.

80 In this study, we first identify physiological differences in a common garden experiment between two closely  
81 related species of *Senecio* that inhabit contrasting elevations on Mt. Etna, Sicily. We then quantify variation  
82 in environmental sensitivity and phenotypic plasticity across four field transplant sites along the elevational  
83 range of both species. *Senecio chrysanthemifolius* (**Fig. 1a**) is a short-lived perennial with highly dissected  
84 leaves that occupies disturbed habitats (e.g., vineyards, abandoned land and roadsides) in the foothills of Mt.  
85 Etna c. 400-1,000m a.s.l (above sea level) and at similar elevations throughout Sicily. By contrast, *S.*  
86 *aethnensis* (**Fig. 1b**) is a perennial with entire, glaucous leaves and is endemic to lava flows c. 2,000-2,600m  
87 a.s.l on Mt. Etna that are covered by snow each winter. These two species diverged recently, probably  
88 c.150,000 years before present, which was concurrent with the uplift of Mt. Etna that created the novel high  
89 elevation environment to which *S. aethnensis* is adapted (Chapman et al. 2013; Osborne et al. 2013). Their  
90 recent shared ancestry is reflected by very low genetic divergence across the genome, despite large  
91 differences in habitat, phenotype and life history (Chapman et al. 2016).

92 Given that *S. aethnensis* is endemic to high elevations on Mt. Etna, while *S. chrysanthemifolius* is found in a  
93 variety of lower-elevation habitats across Sicily, we predicted that: (1) Their occupation of highly contrasting  
94 habitats would be reflected by differences in physiology in a common garden, suggesting functional trait  
95 divergence. (2) As evidence of adaptive divergence, species would perform better at their native elevation,  
96 and better than the foreign species. In addition, *S. aethnensis* would be less tolerant of novel environments,  
97 providing evidence that it is more specialised to its native habitat than *S. chrysanthemifolius*. (3) Despite  
98 clear patterns of adaptive divergence, their recent common ancestry would mean that both species will show  
99 similar patterns of plasticity, and similar patterns of G×E underlying plasticity. By contrast, if ecological  
100 speciation is associated with rapid changes in plasticity, then functional traits associated with adaptive  
101 divergence would also show large differences in plasticity between the two species, and different levels of

102 G×E underlying plasticity. To test these hypotheses, we sampled 37 genotypes of *S. chrysanthemifolius* and  
103 42 genotypes of *S. aethnensis*, from several natural populations of each species. We then reciprocally  
104 transplanted multiple cuttings of each genotype to four transplant sites across an elevational range that  
105 included the home range of each species, and two intermediate elevations. We quantified survival, growth,  
106 leaf gene expression, photosynthetic activity and leaf investment. Given that rapid divergence in leaf shape  
107 and dissection is key feature of speciation in this system, as well as in other *Senecio* species (Walter et al.  
108 2018), we also quantified leaf morphology traits, which are likely to be associated with fitness at different  
109 elevations.

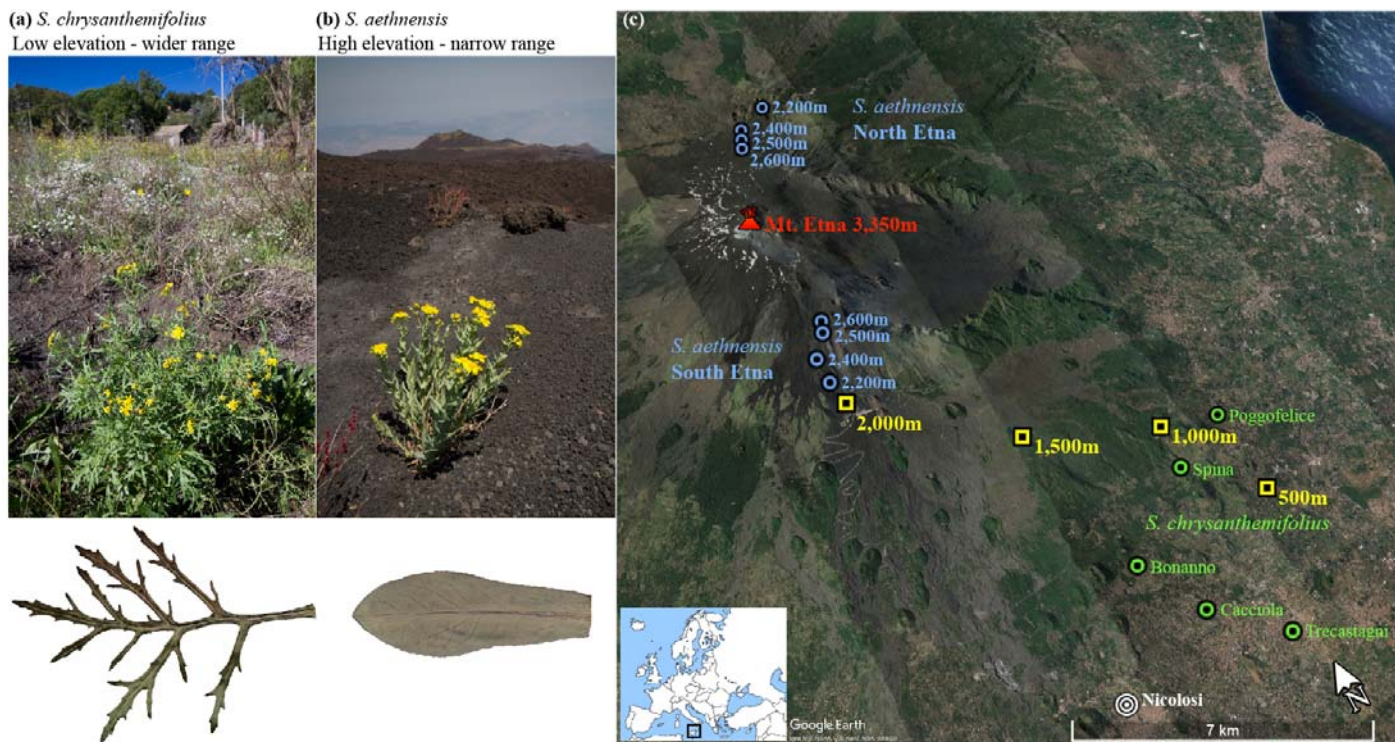

110  
111 **Fig. 1** (a) *Senecio chrysanthemifolius* occupies disturbed habitats below c.1,000m a.s.l, and has thin, dissected leaves. (a) *Senecio*  
112 *aethnensis* inhabits lava flows and has thicker, smooth-margined leaves with a thick waxy cuticle. (c) Map of sampling locations  
113 (*S. chrysanthemifolius*: green circles; *S. aethnensis*: blue circles) and transplant sites (yellow squares). Sampling locations for *S.*  
114 *aethnensis* and the transplant sites are labelled by their elevation. Inset map denotes the location of the study system within Europe.

115

## 116 **Materials and methods**

### 117 *Sampling natural populations*

118 We sampled seeds, and took cuttings from naturally growing individuals of both species after plants started  
119 flowering. This was conducted in May-June 2017 for *S. chrysanthemifolius* and July 2017 for *S. aethnensis*  
120 because *S. aethnensis* grows more slowly and flowers later than *S. chrysanthemifolius*, given its high



121 elevation habitat. For *S. chrysanthemifolius*, we sampled from 88 individuals from five sites, each a  
122 geographically separated patch of individuals representing potentially discrete populations, all below  
123 800m.a.s.l (**Fig 1c, Table S1**). For *S. aethnensis*, we sampled from 87 individuals at four different elevations  
124 (2,600m, 2,500m, 2,400m and 2,300m.a.s.l) on both the North and South slopes of Mt. Etna (**Fig 1c, Table**  
125 **S1**). To minimise the risk of sampling close relatives, most plants sampled were more than 10m apart.

### 126 *Physiological differences between species under common garden conditions*

127 To assess differences in physiology between the species, we grew plants from seeds in a growth cabinet (see  
128 **Methods S1**), which represented environmental conditions intermediate between both species. Seeds were  
129 scarified mechanically and placed in petri dishes containing moist filter paper. Seedlings were transplanted  
130 into 70mm square pots with standard potting mix. From eight maternal families of *S. chrysanthemifolius* we  
131 grew 34 individuals, and from ten maternal families of *S. aethnensis* we grew 41 individuals. Seedlings were  
132 grown for two months and physiological measurements taken. With a Dualex+<sup>®</sup> instrument (ForceA, France),  
133 we measured the leaf content of chlorophyll, anthocyanin and flavonol pigments. Using an LCpro gas  
134 analyser (ADC BioScientific, UK), we measured photosynthetic gas exchange. Intrinsic water use efficiency  
135 (iWUE) was calculated as the ratio between photosynthesis and stomatal conductance. Chlorophyll  
136 fluorescence was measured using an IMAGING-PAM M-series chlorophyll fluorometer (Heinz Walz GmbH,  
137 Effeltrich, Germany). Using output from the fluorometer, we quantified two mechanisms of physiological  
138 light defence of leaves (see **Methods S1**): (1) the unregulated dissipation of heat [Y(NO)], and (2) the  
139 regulated dissipation of heat [Y(NPQ)].

### 140 *Field transplant experiment*

141 In the glasshouse (Giarre, Italy), cuttings from all individuals sampled from natural populations (hereafter,  
142 genotypes) were cut into 5cm stem segments, each possessing 2-3 leaf nodes. Each smaller cutting was then  
143 dipped in rooting plant growth regulator for softwood cuttings (Germon<sup>®</sup> Bew., Der. NAA 0.5%, L. Gobbi,  
144 Italy) and placed in a compressed mix of coconut coir and perlite (1:1) in one cell of an 84-cell tray. All  
145 cuttings (i.e. clones) from each genotype were kept together in one half of a tray, with tray positions  
146 randomised regularly to prevent systematic environmental or positional effects. Trays were kept moist and  
147 checked regularly for cuttings that successfully produced roots (roots extending out of the bottom of tray).  
148 For each genotype, rooted cuttings were randomised into experimental blocks and transplanted at four field  
149 sites. From the initial genotypes sampled, we transplanted 37 *S. chrysanthemifolius* genotypes and 42 *S.*  
150 *aethnensis* genotypes that produced enough cuttings with roots.

151 Field transplant sites were at four elevations (500m, 1,000m, 1,500m and 2,000m a.s.l) along a transect on  
152 the south-eastern side of Mt. Etna (**Fig. 1c**). The 500m site was located in a garden among fruit trees and

153 grape vines, the 1,000m site on an abandoned vineyard among *Quercus ilex*, the 1,500m site among an apple  
154 and pear orchard, and the 2,000m site surrounded by pine trees on a lava flow from 1983. Both the native  
155 elevations (500m for *S. chrysanthemifolius* and 2,000m for *S. aethnensis*) were located less than 1km from  
156 natural populations. Furthermore, plants of both species were often observed at intermediate elevations  
157 (including close to the 1,000m and 1,500m transplant sites), but were never observed within the native range  
158 of the other species. Soil is characterised as a silty sand at elevations between 500m and 1,500m, but changes  
159 to volcanic sand at 2,000m. At each transplant site we deployed four data loggers (Tinytag Plus, Gemini Data  
160 Loggers, UK), which measured temperature hourly. We also took three soil samples at each transplant site,  
161 which were analysed for 36 variables that included nutrients, salts and ions (Nucleo Chimico Mediterraneo  
162 laboratories, Catania, Italy). To analyse the soil data, we used Multi-Dimensional Scaling (MDS) to calculate  
163 the scaled distance between the soil samples taken at all transplant sites.

164 We transplanted multiple cuttings of each genotype into three experimental blocks at each transplant site.  
165 Cuttings were transplanted into grids of 20×7 plants, with the position of cuttings randomised with respect to  
166 genotype, and separated from each other by 40cm (*S. chrysanthemifolius* block  $n=109$ ; site  $n=327$ ; total  
167  $N=1,308$ ; *S. aethnensis* block  $n=130$ ; site  $n=390$ ; total  $N=1,560$ ). Depending on the number of cuttings that  
168 successfully produced roots, we transplanted 6-15 cuttings per genotype at each transplant site (see **Table**  
169 **S1**). Cuttings of *S. chrysanthemifolius* were transplanted in June-July 2017, and cuttings of *S. aethnensis*  
170 were transplanted (into adjacent experimental blocks) at the start of August 2017. The difference in timing  
171 was because seasonal constraints meant that sampling from natural populations of *S. aethnensis* was only  
172 possible after *S. chrysanthemifolius*. Following each transplant, cuttings were watered daily for three weeks  
173 to encourage establishment. To prevent death during high temperatures in July-August (consistently  $>35^{\circ}\text{C}$ ),  
174 we watered cuttings daily during this period, which allowed us to assess the phenotypic responses of  
175 genotypes to what were still stressful conditions. We recorded mortality approximately every two weeks and  
176 measured the phenotypic traits of all plants at a single time point when both species showed substantial post-  
177 transplant growth (November 2017). To test whether the survival rates in this 2017 experiment were  
178 consistent across years, we conducted a similar transplant in 2018 by transplanting both species at the same  
179 time (total  $N=984$  cuttings) in spring (April 2018) and providing less supplementary water.

### 180 *Characterising leaf morphology and investment*

181 Plasticity in leaf investment and leaf shape across elevation are often adaptive responses to changes in  
182 climate or water availability (Nicotra et al. 2008; Royer et al. 2009; Scheepens et al. 2010). To characterise  
183 leaf morphology, we sampled and pressed 3-5 young but fully expanded leaves from each cutting (five and  
184 four months after transplant for *S. chrysanthemifolius* and *S. aethnensis*, respectively). Leaves were weighed,

185 and then scanned and morphology quantified using the program Lamina (Bylesjo et al. 2008), which  
186 generates estimates of leaf area, perimeter and the number of indentations. To estimate the density of  
187 indentations along the leaf margin, we standardised the number of indentations by the perimeter. To capture  
188 leaf complexity we calculated  $\text{perimeter}^2/\text{area}$ , where lower numbers indicate less complex leaves, i.e. more  
189 entire leaves. As measures of leaf investment we included leaf area, and calculated Specific Leaf Area  
190 ( $\text{SLA} = \frac{\text{leaf area}}{\text{leaf weight}}$ ), where greater values represent thinner leaves.

### 191 *Quantifying chlorophyll fluorescence*

192 To quantify photosynthetic capacity for both species across the elevational gradient, at each transplant site  
193 we measured chlorophyll *a* fluorescence, which estimates the efficiency of the photosystem response to  
194 intense light. We selected five genotypes at random from each species and measured chlorophyll  
195 fluorescence on four cuttings per genotype at each transplant site (site  $n=40$  plants, total  $N=160$ ). We took  
196 measurements at two transplant sites each day, completing all four sites within one week in October 2017.  
197 For each cutting we measured four leaves, and to temporally replicate measurements we measured the same  
198 cuttings at each site on a second day. To take measurements, we put leaf clips on four leaves of each plant  
199 and dark-adapted the plants for 30 minutes by covering them with large black plastic containers. We then  
200 took fluorescence induction curve measurements for 2 seconds at  $3,500\mu\text{mol s}^{-1}\text{m}^{-2}$  photosynthetic photon  
201 flux density from each leaf (clip) using a Handy PEA instrument (Hansatech Instruments Ltd., UK). Using  
202 the JIP test (Tsimilli-Michael and Strasser 2013) we calculated  $\text{PI}_{\text{total}}$ , the total performance of photosystem I  
203 and II (see **Methods S1**).

### 204 *Statistical analyses of survival, growth and plasticity*

205 We first tested for significant differences in survival across elevation, and quantified plasticity as the change  
206 in all univariate traits across elevation (all leaf traits were first averaged for each clone). Secondly, to  
207 understand multivariate plasticity across elevation, we standardised each morphological trait to a mean of  
208 zero and standard deviation of one, and then used a Principal Components Analysis (PCA) with leaf area,  
209 complexity, SLA and number of indents. We used the first two principal components (describing 81% of  
210 total variation) to quantify how multivariate phenotypes differed between species, and changed across  
211 elevation.

212 To compare differences in growth, survival, leaf morphology and chlorophyll fluorescence across transplant  
213 sites and for both species, we used linear mixed models in R v3.6.1 (R Core Team 2019 ) within the package  
214 *lme4* v1.1-23 (Bates et al. 2015),

$$215 \quad y_{ijklm} = T_i + S_j + T_i \times S_j + T_i \times G_{k(j)} + B_{l(i)} + e_{m(ijkl)} \cdot \quad (1)$$



216 Separate implementations of equation 1 were used for different univariate response variables of interest  
217 ( $y_{ijklm}$ ). Changes in the response variable across transplant sites were modelled by the  $j$ th species ( $S_j$ ) in the  
218  $i$ th transplant site ( $T_i$ ) and their interaction ( $T_i \times S_j$ ), which were all included as fixed effects. Random effects  
219 included the interaction between transplant site and genotype  $T_i \times G_k(j)$ , and experimental block within each  
220 environment ( $B_{l(i)}$ ). The residual error variance was captured by  $e_{m(ijkl)}$ .

221 Equation 1 was implemented as a generalised linear mixed model with a binomial error distribution for  
222 survival. The remaining phenotypic traits were normally distributed, for which we used a linear mixed  
223 model. For each implementation we tested the significance of the interaction between transplant site and  
224 species using likelihood ratio tests. To test whether differences in morphology between transplant sites were  
225 significant for each species, we used *emmeans* v1.4 (Lenth 2019) to conduct pairwise t-tests adjusted for  
226 multiple comparisons.

227 To test for significant G×E within each species, we applied equation 1 separately for each species on PC1  
228 and PC2. To separate the effect of genotype from G×E, we included genotype and the genotype×elevation  
229 interaction as separate random effects. We tested the significance of all random effects using likelihood ratio  
230 tests. To identify whether G×E was created by changes in the magnitude of among-genotype variance across  
231 elevation, or by differences in reaction norms (i.e., a change in rank of genotypes across elevation), we used  
232 the parameters estimated from equation 1 to calculate

$$233 \quad \sigma_{G \times E}^2 = \frac{\sum_{i=1}^h \sum_{j=1}^h [2\sigma_i \sigma_j (1 - r_{ij}) + (\sigma_i - \sigma_j)^2]}{h(h-1)}, \quad (2)$$

234 where  $\sigma$  represents square root of the variance among genotypes for the  $i$ th and  $j$ th transplant sites. The  
235 number of sites is represented by  $h$ , for which we only compared the elevational extremes (500m and  
236 2,000m). The first term within the square brackets,  $2\sigma_i \sigma_j (1 - r_{ij})$ , represents G×E as differences in reaction  
237 norms, with  $r_{ij}$  representing the genotypic correlation between the  $i$ th and  $j$ th habitats. The second term,  
238  $(\sigma_i - \sigma_j)^2$ , represents G×E as changes in the magnitude of among genotype variance (Cockerham 1963;  
239 Johnson 2007; Friedman et al. 2019).

#### 240 *Sampling of plant tissue and RNA extraction*

241 To quantify gene expression, we sampled 2-3 newly emerged leaves (15-20mm in length) from all cuttings at  
242 a single time-point following the initial transplant, which was after cuttings showed sufficient growth  
243 determined as 12-15 new, fully expanded leaves (July 2017 for *S. chrysanthemifolius*; October 2017 for *S.*  
244 *aethnensis*). All leaves for a cutting were placed in the same Eppendorf tube and stored in RNAlater at -20°C.

245 Three genotypes of each species were then selected at random, and three clones sampled from each transplant  
246 site (36 samples in total per species). We extracted RNA from each sample using QIAgen RNeasy kits.  
247 Library preparation and RNA sequencing was performed at the Oxford Genomics Centre on an Illumina  
248 HiSeq4000 platform, producing 75bp paired-end reads.

#### 249 *Quantifying differential expression across transplant sites, genotypes, and species*

250 A reference transcriptome was assembled for each species (**Methods S1**). Trimmed reads were mapped to  
251 each species' reference transcriptome using *Salmon* v0.13.1 (Patro et al. 2017). Read counts were normalised  
252 by transcript size, library size and filtered based on counts >5 across half of all samples. All estimates were  
253 repeated using *DESeq2* (Love et al. 2014) and *limma/voom* (Law et al. 2014) according to

$$254 \quad \text{Counts} \sim \text{Species} + \text{Transplant Site} + \text{Species} \times \text{Transplant Site} + \text{Genotype} . \quad (3)$$

255 In *limma/voom*, the genotype was modelled as a random effect. For comparisons within species, each  
256 treatment was compared with the home transplant site of each species (2,000m for *S. aethnensis* and 500m  
257 for *S. chrysanthemifolius*), with differentially expressed genes determined based on an adjusted p-value <  
258 0.01 (Benjamini and Hochberg 1995) and a log fold change >2 for overexpression or <-2 for  
259 underexpression. In *DESeq2*, log fold changes were shrunk using the 'apeglm' method and then used to rank  
260 genes based on high overexpression and underexpression.

#### 261 *Annotation of differentially expressed genes and functional enrichment*

262 Reference transcriptomes were annotated using *Trinotate* v3.2.1 (Bryant et al. 2017). Predicted amino-acid  
263 sequences were generated using *TransDecoder* v5.5 (<https://transdecoder.github.io>) and protein sequences  
264 were blasted against the Uniprot database. Annotation of the transcriptomes resulted in 7,579 unique GO  
265 (Gene Ontology) terms for 14,701 transcripts (mean of 7.2 GO terms/transcript).

266 To test for significant representation of functional categories among differentially expressed genes, gene  
267 ontology enrichment analyses were performed using *topGO* v2.3.6 (Alexa and Rahnenfuhrer 2019).  
268 Enrichment was determined using genes that were significantly differentially expressed (adjusted p values <  
269 0.01) between the native transplant site and the furthest transplant site and Kolmogorov-Smirnoff (KS) test  
270 using the 'weight' algorithm.

#### 271 *Weighted network construction of differentially expressed genes*

272 Weighted Gene Coexpression Network Analysis (WGCNA) identifies correlations of expression among all  
273 genes and then forms modules of coexpressed genes within that network. Consensus modules were  
274 constructed for each species (**Methods S1**). Each module was then summarized using its first principal  
275 component as a module eigengene, which represents the expression profile of the module. We tested for

276 a correlation between each module eigengene in each species and transplant elevation. Each module was  
277 tested for gene ontology enrichment in *topGO*, using Fisher's exact test.

278

## 279 Results

### 280 *Physiological differences between species under common garden conditions*

281 Under common garden conditions, *S. chrysanthemifolius* and *S. aethnensis* showed substantial differences in  
282 physiology. Both species had similar values for their ability to regulate heat dissipation from their leaves  
283 [Y(NPQ)] (**Fig. 2a**; *S.ae*  $0.60 \pm 0.008$  [one standard error], *S.ch*  $0.61 \pm 0.010$ ,  $t(65)=0.0116$ ,  $P=0.3760$ ).

284 However, *S. aethnensis* showed greater values than *S. chrysanthemifolius* for non-regulated heat dissipation  
285 [Y(NO)] (**Fig. 2b**; *S.ae*  $0.20 \pm 0.003$ , *S.ch*  $0.18 \pm 0.004$ ,  $t(65)=2.351$ ,  $P=0.0217$ ), which indicates that  
286 photochemical energy conversion and protective regulatory mechanisms are less efficient in *S. aethnensis*.

287 *Senecio chrysanthemifolius* showed evidence of higher intrinsic water use efficiency than *S. aethnensis* (**Fig.**  
288 **2c**; *S.ae*  $62.11 \pm 3.30$ , *S.ch*  $81.76 \pm 3.85$ ,  $t(69)=3.875$ ,  $P=0.0002$ ), suggesting that leaves of *S.*

289 *chrysanthemifolius* conserve water more effectively. *Senecio aethnensis* showed greater leaf concentrations  
290 of chlorophyll (**Fig. 2d**; *S.ae*  $38.16 \pm 1.29$ , *S.ch*  $34.55 \pm 1.50$ ,  $t(143.8)=2.085$ ,  $P=0.0388$ ) and flavonols (**Fig. 2e**;  
291 *S.ae*  $0.88 \pm 0.03$ , *S.ch*  $0.73 \pm 0.03$ ,  $t(200.9)=4.399$ ,  $P<0.0001$ ).

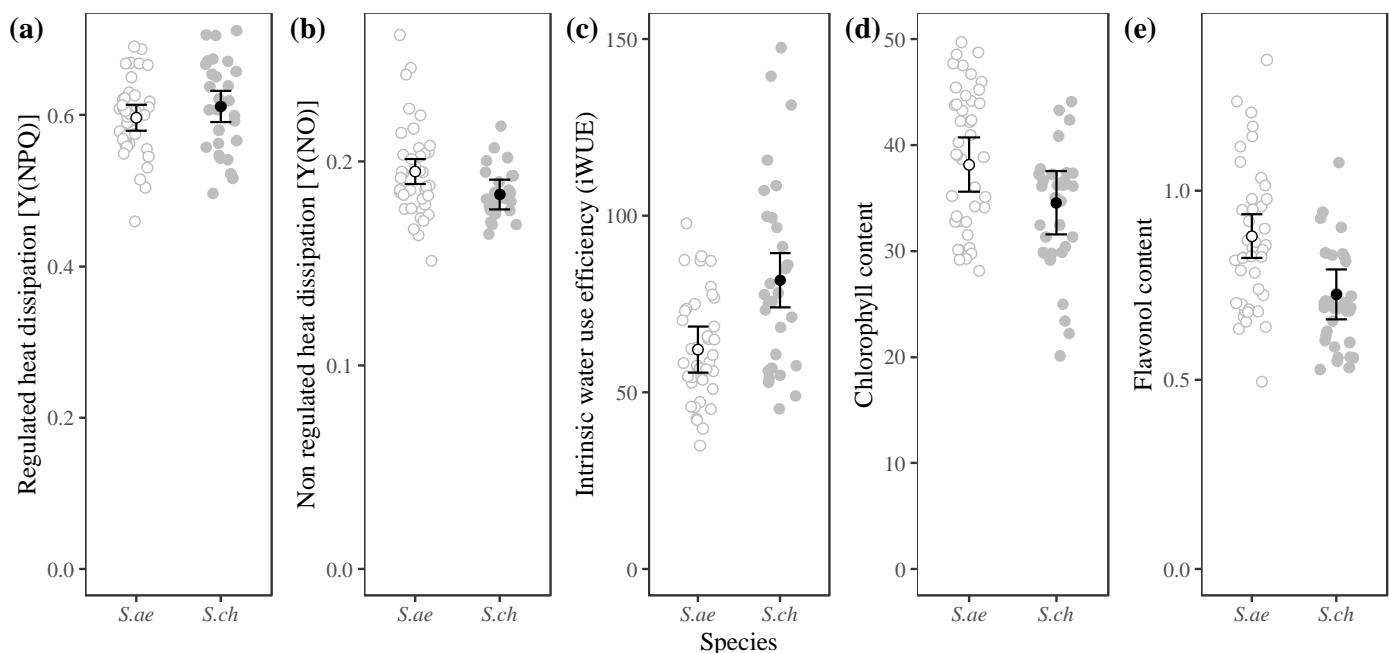

292

293 **Fig. 2** Physiological differences between species grown from seeds under common garden conditions in the laboratory. Filled  
294 circles represent *S. chrysanthemifolius* (*S.ch*), while unfilled circles represent *S. aethnensis* (*S.ae*). Gray circles represent individual  
295 plants measured and credible intervals represent the 95% confidence intervals of the mean. **(a)** Both species showed similar values  
296 for regulated heat dissipation, Y(NPQ). **(b)** *Senecio aethnensis* showed greater values for the unregulated dissipation of heat,  
297 Y(NO). **(c)** *Senecio chrysanthemifolius* showed higher intrinsic water use efficiency, while *S. aethnensis* showed higher leaf  
298 chlorophyll content **(d)** and a higher flavonol content **(e)**.

299

300 *Survival and growth of transplanted cuttings*

301 The transplant sites experience contrasting climatic conditions associated with elevation, with extreme heat  
 302 (regularly exceeding 40°C) at 500m and 1,000m during summer, and extreme cold (regularly below 0°C) at  
 303 1,500m and 2,000m during winter (**Fig. 3a**). Soil profiles separated the four transplant sites in a linear  
 304 fashion along the first axis (MDS1), which represented a transition in soil type and reduction in nutrients  
 305 (amount of organic material, total nitrogen, cation exchange capacity and exchangeable ions) at higher  
 306 elevations (**Fig. 3b**). The second axis (MDS2) characterised differences between the 1,000m site and the  
 307 other sites, associated with greater concentrations of various salts at 1,000m (soluble nitrates, calcium and  
 308 magnesium).

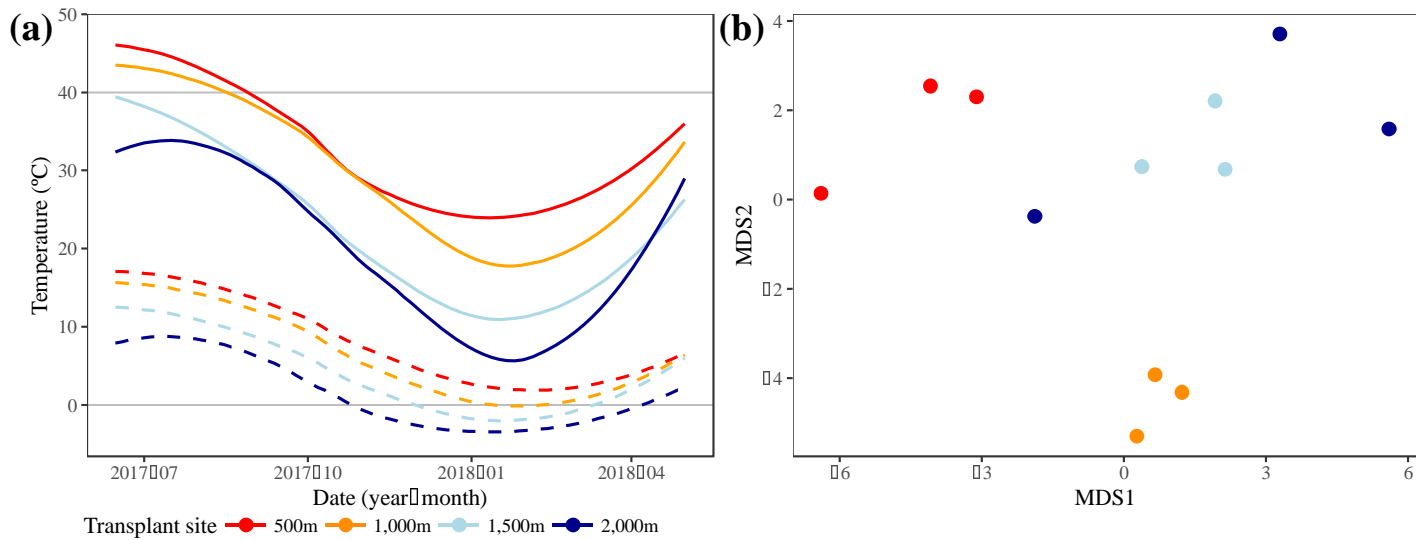

309

310

311 **Fig. 3** Differences in environment for the four transplant sites at four elevations. (a) Average daily maximum (solid lines) and  
 312 minimum (dashed lines) for three data loggers at each site, for the duration of the transplant. Gray shading represents the standard  
 313 error for estimating the coefficients. Higher elevations remained below 40°C in the summer and dropped well below zero in the  
 314 winter. (b) Differences in soil composition for 35 soil variables captured by a multidimensional scaling analysis.

315

316 At the end of the experiment, *S. chrysanthemifolius* only showed high mortality at the highest elevation,  
 317 whereas *S. aethnensis* showed higher mortality at the three lowest elevations compared to its native site (**Fig.**  
 318 **4a**; species×elevation  $\chi^2(3)=37.46$ ,  $P<0.00001$ ). At low elevations (500-1,500m), *S. aethnensis* showed  
 319 greater mortality than *S. chrysanthemifolius* over summer (**Fig. 4b**; species×elevation  $\chi^2(3)=20.94$ ,  
 320  $P=0.00011$ ). By contrast, *S. chrysanthemifolius* showed greater mortality (>90%) over winter at 2,000m (**Fig.**  
 321 **4c**; species×elevation  $\chi^2(3)=19.60$ ,  $P=0.00021$ ). Both species showed similar reductions in height at higher  
 322 elevations (**Fig. 4d**; species×elevation  $\chi^2(3)=6.74$ ,  $P=0.0808$ ). In the 2018 transplant experiment, where  
 323 cuttings of both species were transplanted simultaneously in spring, and with less subsequent watering, we

324 found very similar patterns of survival to 2017. After summer, only 6% and 3% of *S. aethnensis* plants  
 325 remained at 500m and 1,000m, respectively, as compared to 79% and 39% for *S. chrysanthemifolius* (**Fig.**  
 326 **S1**). This consistency in patterns of mortality suggests that the 2017 experiment represented typical patterns  
 327 of mortality.

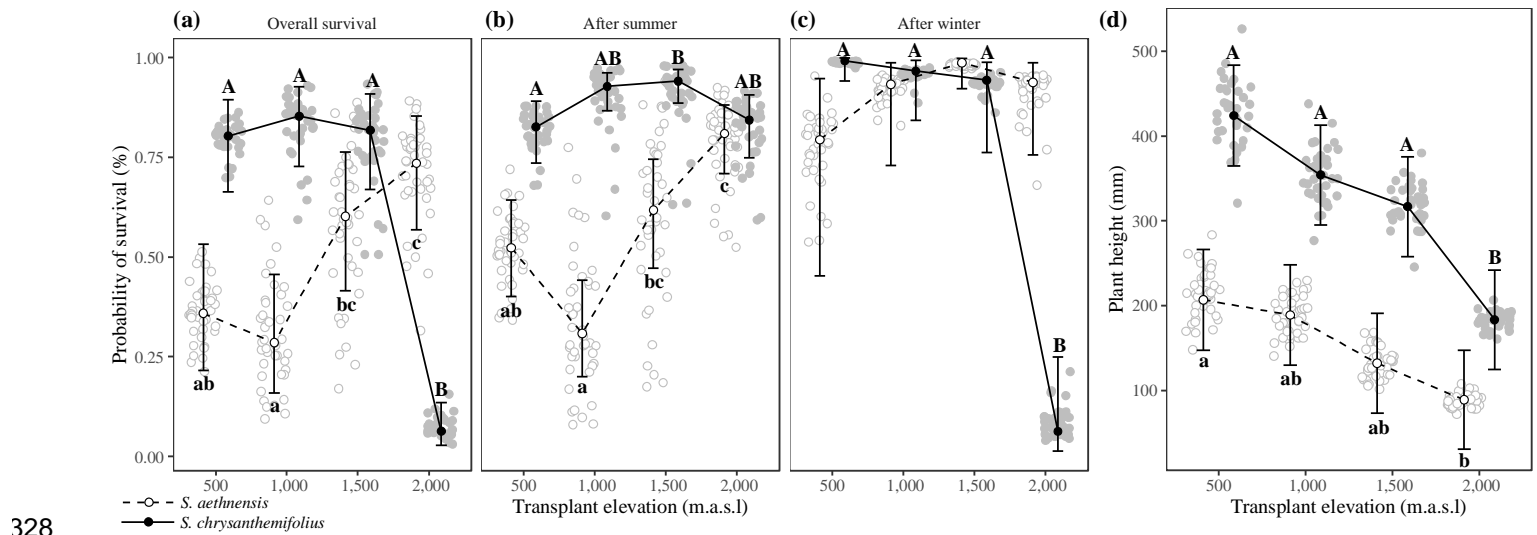

328

329 **Fig. 4** Variation in survival and growth of both species across all transplant sites. Filled circles, solid lines and upper case letters  
 330 represent *S. chrysanthemifolius*, while unfilled circles, dashed lines and lowercase letters represent *S. aethnensis*. Grey points  
 331 represent the mean of all cuttings for each genotype sampled in the natural populations. Credible intervals represent 95%  
 332 confidence intervals for the estimate of the mean and letters denote significant differences (full statistical summaries are located in  
 333 **Table S2**). (a) At the end of the experiment, *S. chrysanthemifolius* showed low survival only at the highest elevation, while *S.*  
 334 *aethnensis* showed lower survival at all three lower elevations. Each species suffered greater mortality during different seasons. (b)  
 335 Survival after summer was high for *S. chrysanthemifolius*, but low for *S. aethnensis* away from its home site. (c) Both species  
 336 survived well after winter, except for *S. chrysanthemifolius* at high elevation. (d) Plants grew larger at lower elevations, and *S.*  
 337 *chrysanthemifolius* grew taller overall.

338

### 339 *Morphological and physiological plasticity across species and elevation*

340 Despite low survival of *S. aethnensis* at lower elevations, enough clones remained to measure almost all  
 341 genotypes at each elevation (only 2-3 *S. aethnensis* genotypes were missing at lower elevations). Both  
 342 species showed plasticity in leaf morphology traits across elevation (**Fig. 5**). *Senecio aethnensis* showed an  
 343 increase in leaf indentation at lower elevations, while *S. chrysanthemifolius* showed no significant change in  
 344 leaf indentation across elevation (**Fig. 5a**; species $\times$ elevation  $\chi^2(3)=30.97$ ,  $P<0.0001$ ). However, *S.*  
 345 *chrysanthemifolius* showed a reduction in leaf complexity at higher elevations, which was reflected by no  
 346 change in *S. aethnensis* (**Fig. 5b**; species $\times$ elevation  $\chi^2(3)=29.15$ ,  $P<0.0001$ ). Both species showed similar  
 347 increases in leaf area at lower elevations (**Fig. 5c**; species $\times$ elevation  $\chi^2(3)=8.93$ ,  $P=0.0302$ ). Both species also  
 348 showed a similar increase in SLA (Specific Leaf Area) at lower elevations, but *S. aethnensis* showed a much  
 349 greater increase at 500m (**Fig. 5d**; species $\times$ elevation  $\chi^2(3)=22.51$ ,  $P<0.0001$ ), suggesting that *S. aethnensis*



350 produced much thinner leaves than *S. chrysanthemifolius* at 500m.

351 We measured chlorophyll fluorescence to calculate the total performance index (PI<sub>total</sub>), which reflects the  
 352 capacity of the photosynthetic machinery. Although *S. chrysanthemifolius* showed no change in PI<sub>total</sub> across  
 353 elevation, *S. aethnensis* showed a steady decline, suggesting reduced photosynthetic activity of *S. aethnensis*  
 354 at lower elevations (**Fig. 5e**; species×elevation  $\chi^2(3)=24.59$ ,  $P<0.0001$ ).

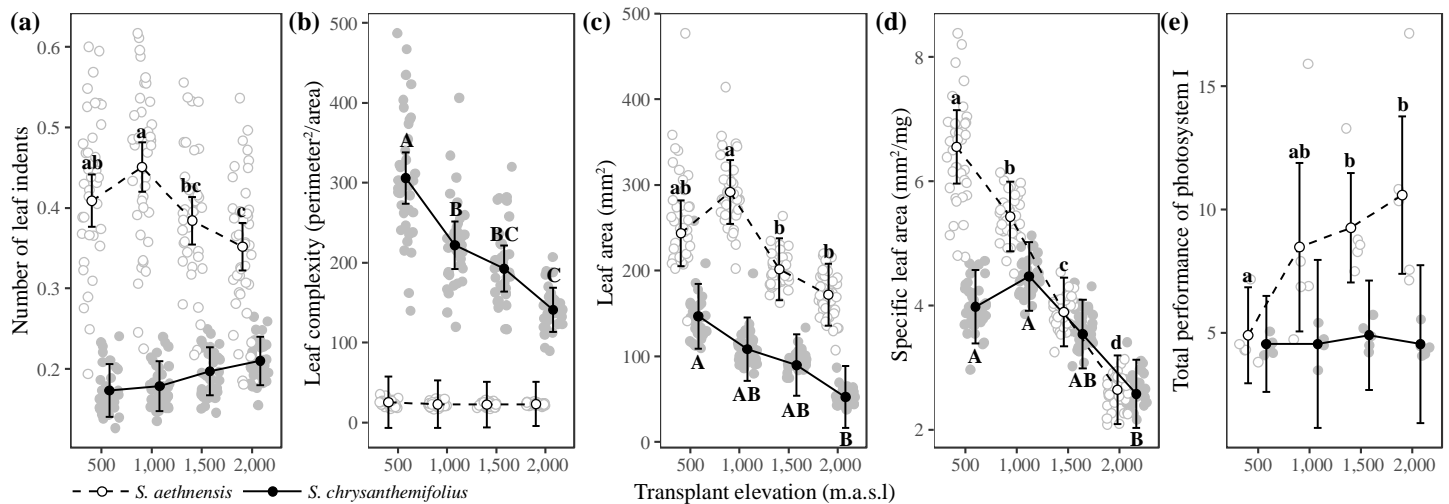

**Fig. 5** Variation in univariate leaf traits across elevation for both species: (a) number of indents, (b) leaf complexity, (c) leaf area, (d) specific leaf area and (e) the performance of photosystem I. Filled circles, solid lines and upper case letters represent *S. chrysanthemifolius*, while unfilled circles, dashed lines and lowercase letters represent *S. aethnensis*. Credible intervals represent 95% confidence intervals for the estimate of the mean of each species at each elevation. Letters denote significant differences between transplant sites calculated using pairwise tests conducted within each species and adjusted for multiple comparisons (full statistical summaries are located in **Table S2**). Grey points represent the mean of all cuttings for each genotype, within species. *Senecio aethnensis* showed significant decreases in the number of indents with elevation, while *S. chrysanthemifolius* showed a decrease in leaf complexity at higher elevations. Leaf area changed similarly across elevation for both species, while specific leaf area was much greater for *S. aethnensis* at lower elevations. *Senecio aethnensis* also showed lower total photosynthetic performance (PI<sub>total</sub>) at lower elevations, while *S. chrysanthemifolius* did not change.

368 To identify how multivariate phenotype changed across elevation, we quantified elevational changes in the  
 369 first two principal components (**Fig. 6a**). Both species showed significant changes in principal component  
 370 scores across the four transplant sites, but patterns differed between the two species. The first principal  
 371 component described differences between species as well as phenotypic differences associated with elevation  
 372 for *S. aethnensis* (**Fig. 6b**; PC1 species×elevation  $\chi^2(3)=33.501$ ,  $P<0.0001$ ). The second principal component  
 373 described similar changes in multivariate morphology across the four transplant sites for both species (**Fig.**  
 374 **6b**; PC2 species×elevation  $\chi^2(3)=3.526$ ,  $P=0.3174$ ). Therefore, outside its native range, plasticity moved the  
 375 phenotype of *S. aethnensis* further from the native phenotype of *S. chrysanthemifolius* (**Fig. 6a**). By contrast,  
 376 *S. chrysanthemifolius* outside its range shifted its phenotype towards that expressed by *S. aethnensis* at high  
 377 elevations.

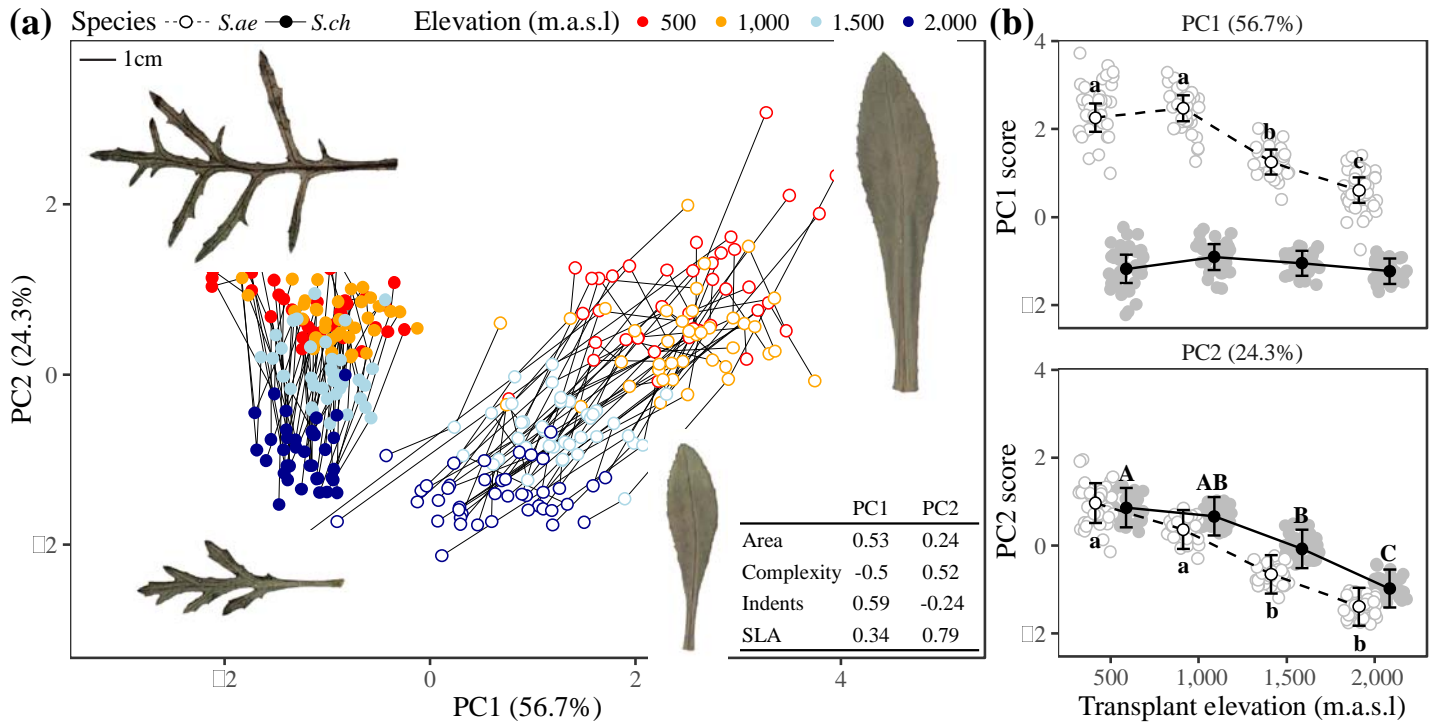

**Fig. 6** Principal component analysis for leaf morphology of both species (*S.ae* = *S. aethnensis*; *S.ch* = *S. chrysanthemifolius*) measured at the four transplant elevations. **(a)** Filled circles and solid lines represent all genotypes of *S. chrysanthemifolius*, and unfilled circles and dashed lines represent the *S. aethnensis* genotypes. Table inset shows the trait loadings for both PC axes. *Senecio aethnensis* changed morphology across elevation for both PC1 (which also represents species differences) and PC2. *Senecio chrysanthemifolius* changed morphology across elevation only for PC2. Inset leaf images represent the extreme differences across elevation for one genotype of each species. **(b)** Analysing changes across elevation using linear mixed models for the first two principal components. Letters denote significant differences at  $P < 0.05$ . *Senecio chrysanthemifolius* changed only in PC1, while *S. aethnensis* changes multivariate phenotype in both PC axes.

### Genotypic variation in plasticity

G×E can be created either by a change in the magnitude of differences among genotypes across sites (i.e., a change in among-genotype variance), or by genotype-specific differences in their response to the environment, where genotypes change rank in different environments (i.e., where genotype reaction norms cross each other). We found that genotypes of both species varied significantly in their response to elevation (**Fig. 7a**). Generally, this meant that the magnitude of the variance among genotypes (within species) changed significantly between elevations, whereby >90% of G×E effects are characterised by changes in among-genotype variance between transplant sites (**Fig. 7a**), and visualised as a greater magnitude of differences among genotypes at 500m compared to 2,000m (**Fig. 7b-c** and **Fig S2**). However, genotypes did not change in rank between elevations. Furthermore, *S. chrysanthemifolius* showed no change in mean for PC1 across elevation, but a large change in PC2 (**Fig. 6**), and this was reflected by the opposite pattern in G×E: strong G×E in PC1 and no G×E in PC2 (**Fig. 7**). By contrast, *S. aethnensis* showed changes in mean (**Fig. 6**) and significant G×E for both principal components (**Fig. 7**).

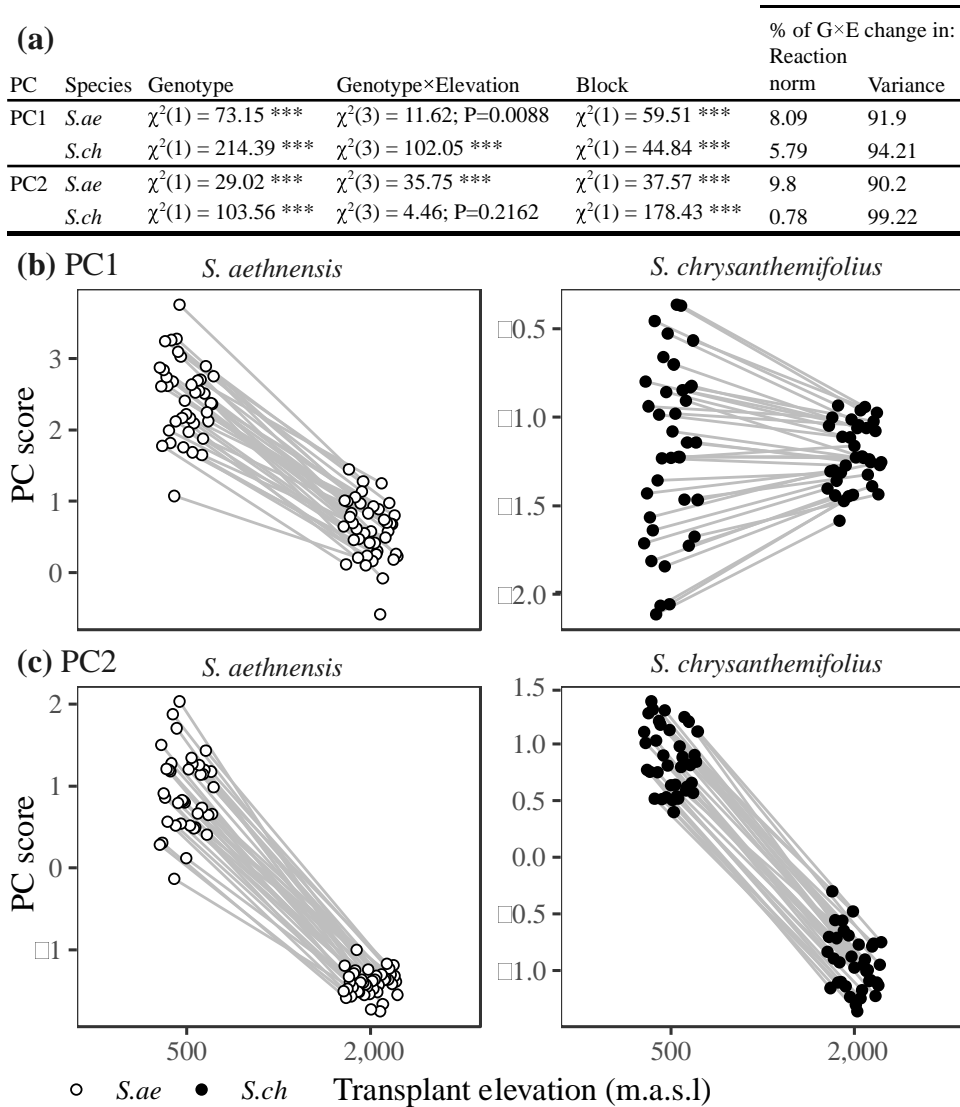

402

403 **Fig. 7** Evidence for G×E in leaf morphology for both species (*S.ae* = *S. aethnensis*; *S.ch* = *S. chrysanthemifolius*). **(a)**  $\chi^2$  statistics  
 404 presented from the likelihood ratio tests for genotype, genotype×elevation and block. The final two columns represent the  
 405 calculation of the percentage contribution for G×E as either change in variance or a crossing of reaction norms. **(b-c)** Visualising  
 406 G×E, where each line represents the change in morphology across elevation for a given genotype. Overall, G×E is evident as  
 407 variation among the genotypes (of each species) in their response to elevation, largely due to changes in variance at a given site and  
 408 not a crossing of reaction norm (see **a**). **(b)** For PC1, only *S. aethnensis* changed in mean across elevation, associated with  
 409 significant, but small change in among-genotype variance between elevations. By contrast, *S. chrysanthemifolius* showed no  
 410 change in mean, but a stronger pattern of G×E. **(c)** For PC2, both species changed similarly in mean, but only *S. aethnensis* showed  
 411 significant G×E.

412

### 413 *Differential gene expression between transplant sites and species*

414 The two methods of estimating differential expression (*DESeq2* vs *limma/voom*) showed similar patterns of  
 415 gene expression variation, although *limma/voom* detected fewer strongly differentially expressed genes in  
 416 each species (**Fig. S3**). Patterns of gene expression between species revealed a high proportion of  
 417 differentially expressed genes at each transplant site, with the most at 2,000m (1,677 genes) and decreasing at  
 418 1,500m (1,451 genes), 1,000m (1,079 genes) and 500m (1,051 genes) (**Fig. 8a**). In total 383 genes were

419 differentially expressed across all elevations. Functional enrichment of differentially expressed genes at each  
420 transplant site reflected differences in photoprotection, pigmentation and water use efficiency (**Fig. 8a**).

421 Within each species, more genes were differentially expressed as genotypes were moved further from their  
422 native elevations (**Fig. S3**). Genes that were differentially expressed between the home site and the most  
423 novel environment (i.e. the elevational extremes) for each species indicated little overlap between the two  
424 species, with just 5.5% and 6.5% of overexpressed and underexpressed genes shared between species (**Fig.**  
425 **8b**). For the ten genes of each species with the largest change in overexpression and underexpression  
426 between 2,000m and 500m, we observed contrasting patterns between the two species: strong overexpression  
427 or underexpression in one species but a relatively unchanged expression profile in the other species (**Fig. 9**).

428 Functional enrichment analyses of differentially expressed genes between the elevational extremes revealed  
429 38 significant GO terms in *S. chrysanthemifolius* and 30 in *S. aethnensis*. Only four out of 68 functional  
430 categories of genes were shared between species (translation, response to blue light, photosynthesis and  
431 ribosomal small subunit assembly; **Tables S3-S4**). In *S. aethnensis*, GO terms indicated physiological  
432 changes to the leaf cuticle, including fatty acid, wax and cutin biosynthesis (**Table S3**). In *S.*  
433 *chrysanthemifolius*, GO terms involved responses to changing light conditions, including protein-  
434 chromophore linkage, light harvesting in Photosystem I and response to high light intensity (**Table S4**).

435 Network reconstruction resulted in 32 network modules ranging in size from 196 to 3,108, with 170 genes  
436 unassigned (**Table S5**). 17 modules showed a significant correlation with elevation (**Fig. 8c**). 7 modules  
437 correlated with elevation uniquely in *S. aethnensis* and were annotated with terms including phyllome  
438 development, translational initiation, protein targeting to chloroplasts, response to heat and immune response.  
439 6 modules correlated with elevation uniquely in *S. chrysanthemifolius* and were annotated with terms  
440 including cold-induced morphogenesis, response to nitrogen starvation, response to far red light, light  
441 harvesting and protein depolymerisation.

442

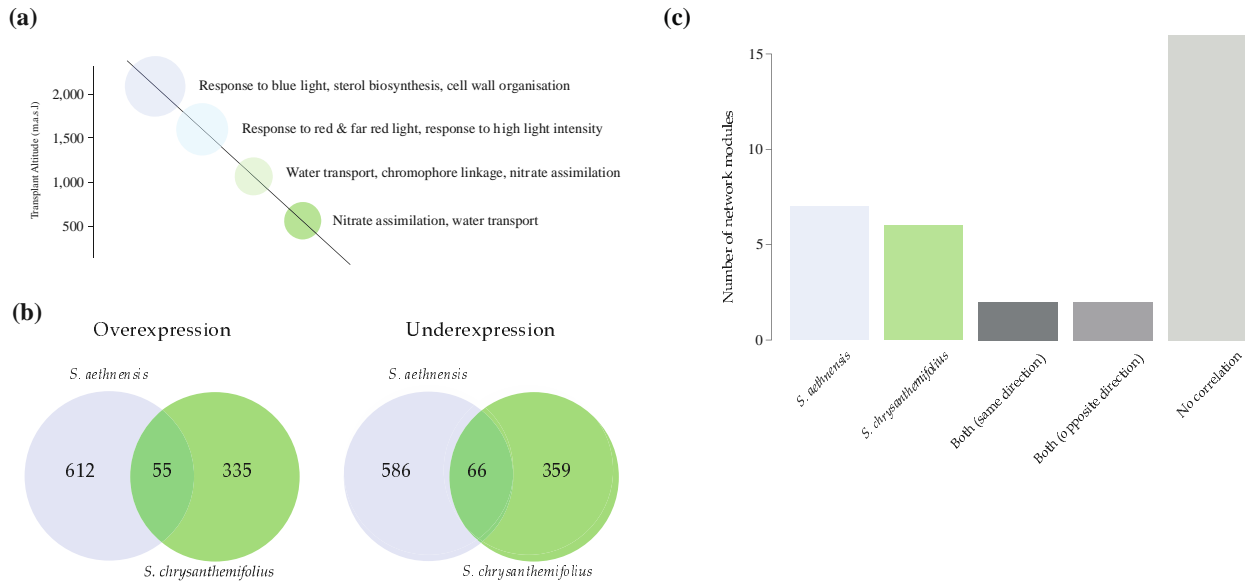

443 **Fig. 8** Contrasting patterns of gene expression between species. (a) Total numbers of differentially expressed genes ( $-2 < \text{lfc} > 2$ )  
 444 between species at each transplant site are represented by circles, with the diameter proportional to the number of genes. The most  
 445 significantly enriched gene ontology categories are shown next to each circle (b) Overlapping overexpressed and underexpressed  
 446 genes between the home and furthest transplant site in each species. (c) The number of significant correlations (adjusted  $p < 0.05$ )  
 447 between network module eigengenes and elevation in each species.

448

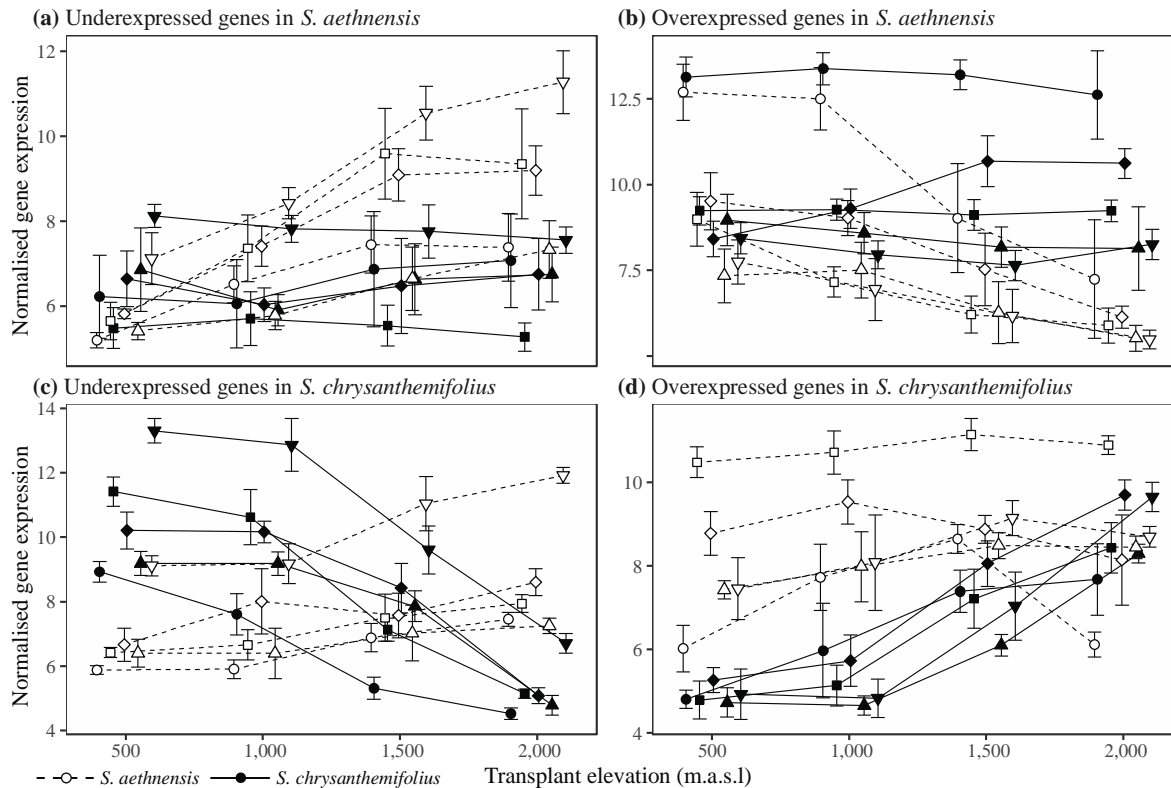

449

450 **Fig. 9** Normalised expression profiles across all transplant sites for *S. chrysanthemifolius* (solid lines and circles) compared to *S.*  
 451 *aethnensis* (dashed lines and unfilled circles). This includes the five genes (represented by different shapes) that are most strongly  
 452 underexpressed in *S. aethnensis* (a), overexpressed in *S. aethnensis* (b), and the five genes most strongly underexpressed in *S.*  
 453 *chrysanthemifolius* (c) and overexpressed in *S. chrysanthemifolius* (d). Strong overexpression or underexpression in one species  
 454 was typically reflected by little to no change in gene expression in the same gene for the other species.



455

## 456 Discussion

457 Given the two *Senecio* species on Mt. Etna are the result of recent ecological speciation, we predicted that (1)  
458 the two species would exhibit differences in physiology when grown in common garden conditions, and (2)  
459 that species would perform well in their native habitat, but poorly in the habitat of the other species. In  
460 addition, we predicted that, given *S. aethnensis* is endemic to high elevations on Mt. Etna, it would maintain  
461 high fitness across a narrower range of elevations than *S. chrysanthemifolius*. (3) We also predicted that due  
462 to their recent common ancestry, both species would display similar patterns of plasticity, and similar  
463 patterns of G×E underlying plasticity.

464 Consistent with our first prediction, genotypes of both species showed distinct behaviour in the common  
465 garden experiment (**Fig. 2**), indicating that adaptive divergence in high and low elevation habitats has  
466 generated substantial shifts in physiology. In support of our second prediction, *S. aethnensis* showed reduced  
467 survival at all elevations outside its native elevation, while *S. chrysanthemifolius* only showed reduced  
468 survival at the elevation furthest from its native elevation (**Fig. 4a**). Furthermore, *S. aethnensis* suffered  
469 greater mortality at the start of the transplant experiment (i.e. during summer), which occurred early in their  
470 flowering season and likely reduced flower and seed production (**Fig. 4b**). By contrast, high mortality for *S.*  
471 *chrysanthemifolius* was only recorded at the highest elevation after an extensive flowering season (i.e. during  
472 winter; **Fig. 4c**), suggesting that fecundity would likely be higher for *S. chrysanthemifolius* across the entire  
473 elevation gradient during the experiment. Reduced photosynthetic activity at lower elevations was also  
474 associated with lower survival for *S. aethnensis*, which contrasted with *S. chrysanthemifolius* that maintained  
475 a lower, but constant photosynthetic activity across elevation (**Fig. 5e**). These results support our prediction  
476 that *S. chrysanthemifolius* can tolerate a wider range of environmental variation compared to *S. aethnensis*,  
477 reflecting its broader distribution across a wider range of (lowland) habitats across Sicily.

478 However, contrary to our third prediction, we found different patterns of plasticity in phenotype (**Figs. 5-6**)  
479 and gene expression (**Figs. 8-9**) between the two species. *Senecio chrysanthemifolius* showed substantial  
480 reductions in leaf complexity at higher elevations but showed little change in the number of leaf indents. By  
481 contrast, *S. aethnensis* showed little change in leaf complexity, but a reduced number of leaf indentations  
482 when grown at higher elevations. These leaf morphology traits that showed divergence in plasticity between  
483 the two species were also associated with differences in trait mean, suggesting an important link between  
484 adaptive divergence and plasticity. Both species produced larger, thinner leaves at lower elevations, but *S.*  
485 *aethnensis* produced significantly thinner leaves than *S. chrysanthemifolius* at the lowest elevation. Taken  
486 together, phenotypic plasticity in *S. chrysanthemifolius* for these traits increased its resemblance to the

487 multivariate phenotype of *S. aethnensis* at high elevation. By contrast, phenotypic plasticity in *S. aethnensis*  
488 reduced its resemblance to *S. chrysanthemifolius* at lower elevations. We also detected significant G×E  
489 interactions underlying plasticity in leaf traits (**Fig. 7**), suggesting standing variation that could allow  
490 plasticity to evolve in response to novel environmental conditions. However, contrary to our prediction that  
491 both species would show similar levels of G×E interactions, we found evidence that patterns of G×E  
492 interactions were stronger for genotypes of *S. aethnensis* (**Fig. 7**).

493 Consistent with the distinct forms of phenotypic plasticity observed, but also contrary to our third prediction,  
494 gene expression changes across elevation involved surprisingly distinct gene networks for the two species.  
495 The number and nature of differentially expressed genes changed with elevation (**Fig 8a**), with only 1.6% of  
496 genes differentially expressed being shared between the two species within any given transplant site. This  
497 result also means that the vast majority of differentially expressed genes were induced by the elevational  
498 gradient. Genes showing large changes in expression in one species across elevations showed either small or  
499 non-existent changes in the other species (**Fig. 9**), while 13 gene network modules were strongly correlated  
500 with elevation in one species, but not in the other.

501 The genotypes taken and cultivated for transplant in the field were from large adult individuals in the wild,  
502 meaning that they represent a locally fit subset of genotypes taken from all the genotypes generated among  
503 the seeds of natural populations. The plastic responses of cuttings from these genotypes are also likely to  
504 have already been shaped by developmental decisions in earlier life, as well as individual differences among  
505 plants, for example in their health and age (Morey and Reznick 2000; Weinig and Delph 2001). Nevertheless,  
506 these data reflect clear differences in plasticity between species for genotypes growing in natural populations.

#### 507 *Putative function of differentially expressed genes*

508 We identified c.600 loci per species that showed differential expression between the extreme elevations.  
509 *Senecio chrysanthemifolius* showed the greatest change in genes relating to photosynthesis, light response  
510 and circadian rhythm. These are traits that typically vary in response to the reduced temperature and  
511 increased light intensity associated with increasing elevation (Beis and Patakas 2012). By contrast, changes  
512 observed in *S. aethnensis* were in genes associated with the leaf cuticle, including the biosynthesis of cutin,  
513 waxes and fatty acids. Changes in the cuticle could reflect a response to biotic and abiotic stressors that are  
514 strongest at the lower elevation, such as pathogens or rates of water loss (Serrano et al. 2014).

515 At each transplant site, the genes differentially expressed between species were associated with functions that  
516 reflected the differences observed in physiological measures between species grown under common garden  
517 conditions. For example, genes relating to water use were differentially expressed between the species at  
518 lower elevations, which were reflected by greater water use efficiency in the leaves of *S.*

519 *chrysanthemifolius* in the common garden experiment. Likewise, genes differentially expressed at higher  
520 elevations were associated with light responses, photosynthesis and cuticle composition, which could reflect  
521 the differences in pigment composition observed between the leaves of the species grown in the common  
522 garden. This functional significance of the genes that vary most in expression, and differ between these  
523 species, provides further support that adaptive divergence has shaped the evolution of distinct forms of  
524 plasticity in these species.

#### 525 *Adaptive divergence between the two Sicilian Senecio species*

526 Our data indicate that the plastic responses of either species are not sufficient for them to maintain fitness at  
527 the native elevations of the other species, and that this is especially the case for *S. aethnensis* (**Fig. 4a**).  
528 Adaptation of these species to the contrasting habitats on and around Mt. Etna is likely to result in selection  
529 against genotypes of either species outside their native habitat, which is likely to reduce any gene flow  
530 between the species (Ross 2010). Results from the common garden experiment suggest that such ecological  
531 divergence has resulted in differentiation in functional traits related to light defence and leaf pigments.  
532 Furthermore, the field transplants reveal that divergence of functional traits at the gene network and  
533 phenotypic level was associated with adaptation to the contrasting elevations. Therefore, reductions in  
534 survival outside each species native ranges seems likely to be due to divergence in traits that contribute to  
535 adaptation in their native habitat (Ross 2010).

536 This species pair forms a narrow hybrid zone (c.1.5 km wide) at approximately 1,500-1,700m elevation.  
537 Although the parental forms can form hybrids, there is evidence of intrinsic reproductive isolation that results  
538 in low fitness of the F2 and F3 generations (Hegarty et al. 2009). There is also evidence that parental  
539 individuals rarely meet on Mt. Etna, instead the hybrid zone is almost entirely populated by hybrid  
540 phenotypes that have only occasional contact with parental individuals due to the separation between the  
541 hybrid zone and parental populations (Brennan et al. 2009). However, it remains possible that some mutually  
542 beneficial alleles are able to spread into the parental genomes of either species, making it even more  
543 remarkable that we detected divergence in plasticity between the two species.

#### 544 *Adaptive divergence creates differences in plasticity*

545 Our results suggest that adaptive divergence has a rapid effect on patterns of phenotypic plasticity and on the  
546 genetic basis of plasticity, even in two closely related species. It remains possible that genetic drift during the  
547 formation of these two species could cause the species-specific differences in plasticity that we observed.  
548 However, given substantial divergence in leaf form and physiology, the differences in plasticity of these  
549 same traits among species, and the higher fitness of each species at their native versus novel habitats, it  
550 seems far more likely that adaptive divergence between *S. aethnensis* and *S. chrysanthemifolius* is

551 responsible for their distinct plastic responses (Taylor and Aarssen 1988; Emery et al. 1994; Ho and Zhang  
552 2018). In addition, genetic drift would also need to be exceptionally strong and persistent to create such  
553 distinct differences in plasticity.

554 Understanding how plasticity evolves is important for understanding how species can respond to novel  
555 environmental variation (Bradshaw 1965; Baythavong and Stanton 2010). Plants growing in more predictable  
556 environments should evolve reduced plasticity where stabilising selection is stronger (Emery et al. 1994;  
557 Alpert and Simms 2002; Baythavong 2011). In other studies, high-elevation populations showed reduced  
558 plasticity in flowering time (Schmid et al. 2017) and morphology (Emery et al. 1994) compared to low  
559 elevation populations. Similarly, we found that the high elevation species, *S. aethnensis*, showed a steeper  
560 decline in fitness than *S. chrysanthemifolius* across the elevational gradient (**Fig. 4a**), and this was associated  
561 with stronger reductions in leaf investment (**Fig. 5d**), lower photosynthetic activity (**Fig. 5e**) and reduced  
562 capacity to approach the native phenotype of *S. chrysanthemifolius* at lower elevations. Therefore, the  
563 distinct patterns of plasticity observed for the two species may be caused by *S. aethnensis* exhibiting  
564 maladaptive plasticity as a consequence of greater specialisation to the high elevation habitat.

565 We suggest two possible explanations for the distinct patterns of plasticity in these species. First, species may  
566 have reduced plasticity in traits that are not required for tracking environmental variation in their respective  
567 habitats. For example, as a perennial that grows from rootstock after winter each year, it is likely that the new  
568 leaves *S. aethnensis* produces each year possess different cuticles that are optimal for the specific  
569 environmental conditions, allowing *S. aethnensis* to track environmental variation across years. In this case,  
570 plasticity in leaf cuticle would be critical to buffer environmental variation across years at high elevations,  
571 and so would also show plasticity when transplanted to lower elevations, even if such plastic changes were  
572 maladaptive. By contrast, plasticity in traits that increase survival at low elevations may not be required to  
573 track environmental variation at high elevations, and are then lost. Therefore, as a consequence of adapting to  
574 the environmental variation specific to their native elevations, these species could show different patterns of  
575 plasticity because they have lost the plastic response that would increase survival in the other species'  
576 habitat.

577 The second explanation is that species will show reduced plasticity in the genes and traits that need to be  
578 continually expressed in their native habitat. This would occur if plastic responses required to initially  
579 colonise the high elevation habitat become genetically-based (via genetic assimilation) because consistently  
580 strong stabilising selection for a single phenotype is favoured (Waddington 1953). This would suggest that as  
581 divergent selection drives trait divergence between the two species, it changes the level of plasticity in the  
582 traits that are diverging. In this scenario, plasticity would only be retained in traits that maintain fitness in

583 response to the environmental variation experienced within their native habitat. For example, *S. aethnensis*  
584 shows a greater number of indents, as well as greater plasticity in this trait (**Fig. 5a**), while *S.*  
585 *chrysanthemifolius* shows both greater leaf complexity than *S. aethnensis*, as well as greater plasticity in this  
586 trait (**Fig. 5b**). At high elevations *Senecio aethnensis* is likely to experience consistently strong selection for  
587 less complex leaves, leading to a loss of plasticity in this trait, perhaps via genetic assimilation. By contrast,  
588 *S. chrysanthemifolius* likely experiences selection for more complex leaves, but the variety of habitats that  
589 this species occupies could maintain plasticity in this trait.

590 Traits, such as leaf complexity or leaf indentation, that show strong divergence between species as well as  
591 differences between species in plasticity, are likely to be under selection in at least one environment. During  
592 adaptive divergence, selection could either maintain or remove plasticity depending on which of the two  
593 explanations outlined above determine plasticity. Distinguishing between these explanations requires  
594 exploring how selection affects the evolution of plasticity in different traits and environmental regimes  
595 (Schmitt et al. 1999; Pratt and Mooney 2013; McLean et al. 2014). Such information could reveal how the  
596 fixation of alleles underlying adaptive trait divergence also affects trait plasticity.

#### 597 *Genotype-by-environment interactions and the evolutionary potential of plasticity*

598 The lower tolerance of *S. aethnensis* to conditions beyond its native range suggests that adaptation to the high  
599 elevation environment has reduced its ability to respond to novel environmental variation at lower elevations.  
600 Such limits to plasticity threaten the persistence of high elevation species in response to climate change  
601 unless genotypic variation in plasticity (G×E) can promote rapid adaptation. In both species we found  
602 significant genotypic variation in plastic responses to the elevational gradient, suggesting substantial  
603 evolutionary potential. *Senecio aethnensis* showed substantial G×E in both the multivariate axis that  
604 separated the two species, and in the axis associated with consistent phenotypic change across elevation for  
605 both species. By contrast, *S. chrysanthemifolius* displayed substantial G×E in the multivariate axis that  
606 separated the two species, but not in the axis associated with consistent phenotypic change across elevation.  
607 This suggests little genetic variation for plasticity (and therefore adaptive potential) in response to elevational  
608 shifts in *S. chrysanthemifolius*, even though the plastic responses shown allow relatively good performance  
609 across a wide elevational range. Consistent with other studies (e.g., Friedman et al. 2019), G×E patterns in  
610 phenotype were largely created by changes in the amount of variance observed among genotypes across the  
611 elevational gradient (**Fig. 7**), rather than by genotype-specific (i.e., change in genotype rank between  
612 environments) responses to the environment. In other words, genotypes tended to vary in their magnitude of  
613 plasticity across elevation, which could promote adaptive responses across generations if the steepness of the  
614 reaction norm determines fitness in novel environments.



515

516 **References**

- 517 Alexa, A., and J. Rahnenfuhrer. 2019. topGO: enrichment analysis for gene ontology, version v2.3.6.R  
518 *package*.
- 519 Alpert, P., and E. L. Simms. 2002. The relative advantages of plasticity and fixity in different environments:  
520 when is it good for a plant to adjust? *Evolutionary Ecology* 16:285-297.
- 521 Bates, D., M. Machler, B. M. Bolker, and S. C. Walker. 2015. Fitting linear mixed-effects models using  
522 lme4. *Journal of Statistical Software* 67:1-48.
- 523 Baythavong, B. S. 2011. Linking the spatial scale of environmental variation and the evolution of phenotypic  
524 plasticity: selection favors adaptive plasticity in fine-grained environments. *The American Naturalist*  
525 178:75-87.
- 526 Baythavong, B. S., and M. L. Stanton. 2010. Characterizing Selection on Phenotypic Plasticity in Response  
527 to Natural Environmental Heterogeneity. *Evolution* 64:2904-2920.
- 528 Beis, A., and A. Patakas. 2012. Relative contribution of photoprotection and anti-oxidative mechanisms to  
529 differential drought adaptation ability in grapevines. *Environmental and Experimental Botany* 78:173-  
530 183.
- 531 Benjamini, Y., and Y. Hochberg. 1995. Controlling the False Discovery Rate: A Practical and Powerful  
532 Approach to Multiple Testing. *Journal of the Royal Statistical Society. Series B (Methodological)*  
533 57:289-300.
- 534 Bradshaw, A. D. 1965. Evolutionary significance of phenotypic plasticity in plants. *Advances in Genetics*  
535 13:115-155.
- 536 Brennan, A. C., J. R. Bridle, A. L. Wang, S. J. Hiscock, and R. J. Abbott. 2009. Adaptation and selection in  
537 the *Senecio* (Asteraceae) hybrid zone on Mount Etna, Sicily. *New Phytologist* 183:702-717.
- 538 Bryant, D. M., K. Johnson, T. DiTommaso, T. Tickle, M. B. Couger, D. Payzin-Dogru, T. J. Lee et al. 2017.  
539 A Tissue-Mapped Axolotl De Novo Transcriptome Enables Identification of Limb Regeneration  
540 Factors. *Cell Reports* 18:762-776.
- 541 Bylesjo, M., V. Segura, R. Y. Soolanayakanahally, A. M. Rae, J. Trygg, P. Gustafsson, S. Jansson et al.  
542 2008. LAMINA: a tool for rapid quantification of leaf size and shape parameters. *BMC Plant Biology*  
543 8.
- 544 Chapman, M. A., S. J. Hiscock, and D. A. Filatov. 2013. Genomic divergence during speciation driven by  
545 adaptation to altitude. *Molecular Biology and Evolution* 30:2553-2567.
- 546 —. 2016. The genomic bases of morphological divergence and reproductive isolation driven by ecological  
547 speciation in *Senecio* (Asteraceae). *Journal of Evolutionary Biology* 29:98-113.
- 548 Charmantier, A., R. H. McCleery, L. R. Cole, C. Perrins, L. E. B. Kruuk, and B. C. Sheldon. 2008. Adaptive  
549 phenotypic plasticity in response to climate change in a wild bird population. *Science* 320:800-803.

- 350 Chevin, L. M., and A. A. Hoffmann. 2017. Evolution of phenotypic plasticity in extreme environments.  
351 *Philosophical Transactions of the Royal Society of London Series B-Biological Sciences* 372.
- 352 Chevin, L. M., and R. Lande. 2011. Adaptation to marginal habitats by evolution of increased phenotypic  
353 plasticity. *Journal of Evolutionary Biology* 24:1462–1476.
- 354 Chevin, L. M., R. Lande, and G. M. Mace. 2010. Adaptation, plasticity, and extinction in a changing  
355 environment: towards a predictive theory. *PLoS Biology* 8:e1000357.
- 356 Cockerham, C. C. 1963. Estimation of genetic variances, Pages 53-94 *in* W. D. Hanson, and H. F. Robertson,  
357 eds. *Statistical genetics and plant breeding*. Washington DC, USA: National Academy of Sciences -  
358 National Research Council.
- 359 Colicchio, J. M., P. J. Monnahan, J. K. Kelly, and L. C. Hileman. 2015. Gene expression plasticity resulting  
360 from parental leaf damage in *Mimulus guttatus*. *New Phytologist* 205:894-906.
- 361 de Jong, G. 2005. Evolution of phenotypic plasticity: patterns of plasticity and the emergence of ecotypes.  
362 *New Phytologist* 166:101-117.
- 363 Debat, V., and P. David. 2001. Mapping phenotypes: canalization, plasticity and developmental stability.  
364 *Trends in Ecology & Evolution* 16:555-561.
- 365 Emery, R. J. N., C. C. Chinnappa, and J. G. Chmielewski. 1994. Specialization, Plant Strategies, and  
366 Phenotypic Plasticity in Populations of *Stellaria longipes* Along an Elevational Gradient.  
367 *International Journal of Plant Sciences* 155:203-219.
- 368 Friedman, J., T. E. Middleton, and M. J. Rubin. 2019. Environmental heterogeneity generates intrapopulation  
369 variation in life-history traits in an annual plant. *New Phytologist* 224:1171-1183.
- 370 Ghalambor, C. K., J. K. McKay, S. P. Carroll, and D. N. Reznick. 2007. Adaptive versus non-adaptive  
371 phenotypic plasticity and the potential for contemporary adaptation in new environments. *Functional*  
372 *Ecology* 21:394-407.
- 373 Gibson, G., and G. Wagner. 2000. Canalization in evolutionary genetics: a stabilizing theory? *Bioessays*  
374 22:372-380.
- 375 Hegarty, M. J., G. L. Barker, A. C. Brennan, K. J. Edwards, R. J. Abbott, and S. J. Hiscock. 2009. Extreme  
376 changes to gene expression associated with homoploid hybrid speciation. *Molecular Ecology* 18:877-  
377 889.
- 378 Ho, W. C., and J. Z. Zhang. 2018. Evolutionary adaptations to new environments generally reverse plastic  
379 phenotypic changes. *Nature Communications* 9:1-11.
- 380 Johnson, M. T. J. 2007. Genotype-by-environment interactions leads to variable selection on life-history  
381 strategy in Common Evening Primrose (*Oenothera biennis*). *Journal of Evolutionary Biology* 20:190-  
382 200.
- 383 Josephs, E. B. 2018. Determining the evolutionary forces shaping G x E. *New Phytologist* 219:31-36.
- 384 Kellermann, V., A. A. Hoffmann, J. Overgaard, V. Loeschcke, and C. M. Sgrò. 2018. Plasticity for  
385 desiccation tolerance across *Drosophila* species is affected by phylogeny and climate in complex

- 386 ways. Proceedings of the Royal Society B-Biological Sciences 285.
- 387 Kulkarni, S. S., I. Gomez-Mestre, C. L. Moskalik, B. L. Storz, and D. R. Buchholz. 2011. Evolutionary  
388 reduction of developmental plasticity in desert spadefoot toads. Journal of Evolutionary Biology  
389 24:2445-2455.
- 390 Lande, R. 2009. Adaptation to an extraordinary environment by evolution of phenotypic plasticity and  
391 genetic assimilation. Journal of Evolutionary Biology 22:1435-1446.
- 392 Law, C. W., Y. Chen, W. Shi, and G. K. Smyth. 2014. voom: precision weights unlock linear model analysis  
393 tools for RNA-seq read counts. Genome Biology 15:R29.
- 394 Lenth, R. V. 2019.emmeans: Estimated Marginal Means, aka Least-Squares Means, version v.1.4,  
395 <https://CRAN.R-project.org/package=emmeans>.
- 396 Lortie, C. J., and L. W. Aarssen. 1996. The specialization hypothesis for phenotypic plasticity in plants.  
397 International Journal of Plant Sciences 157:484-487.
- 398 Love, M. I., W. Huber, and S. Anders. 2014. Moderated estimation of fold change and dispersion for RNA-  
399 seq data with DESeq2. Genome Biology 15.
- 700 McLean, E. H., S. M. Prober, W. D. Stock, D. A. Steane, B. M. Potts, R. E. Vaillancourt, and M. Byrne.  
701 2014. Plasticity of functional traits varies clinally along a rainfall gradient in *Eucalyptus tricarpa*.  
702 Plant, Cell & Environment 37:1440-1451.
- 703 Morey, S., and D. Reznick. 2000. A comparative analysis of plasticity in larval development in three species  
704 of spadefoot toads. Ecology 81:1736-1749.
- 705 Nicotra, A. B., M. J. Cosgrove, A. Cowling, C. D. Schlichting, and C. S. Jones. 2008. Leaf shape linked to  
706 photosynthetic rates and temperature optima in South African *Pelargonium* species. Oecologia  
707 154:625-635.
- 708 Oostra, V., M. Saastamoinen, B. J. Zwaan, and C. W. Wheat. 2018. Strong phenotypic plasticity limits  
709 potential for evolutionary responses to climate change. Nature Communications 9:1-11.
- 710 Osborne, O. G., T. E. Batstone, S. J. Hiscock, and D. A. Filatov. 2013. Rapid speciation with gene flow  
711 following the formation of Mt. Etna. Genome Biology and Evolution 5:1704-1715.
- 712 Patro, R., G. Duggal, M. I. Love, R. A. Irizarry, and C. Kingsford. 2017. Salmon provides fast and bias-  
713 aware quantification of transcript expression. Nature Methods 14:417.
- 714 Pigliucci, M. 2005. Evolution of phenotypic plasticity: where are we going now? Trends in Ecology &  
715 Evolution 20:481-486.
- 716 Pigliucci, M., K. Cammell, and J. Schmitt. 1999. Evolution of phenotypic plasticity a comparative approach  
717 in the phylogenetic neighbourhood of *Arabidopsis thaliana*. Journal of Evolutionary Biology 12:779-  
718 791.
- 719 Poisot, T., J. D. Bever, A. Nemri, P. H. Thrall, and M. E. Hochberg. 2011. A conceptual framework for the  
720 evolution of ecological specialisation. Ecology Letters 14:841-851.
- 721 Pratt, J. D., and K. A. Mooney. 2013. Clinal adaptation and adaptive plasticity in *Artemisia californica*:

- 722 implications for the response of a foundation species to predicted climate change. *Global Change*  
723 *Biology* 19:2454-2466.
- 724 R Core Team. 2019 R: A language and environment for statistical computing, version 3.6.1. R Foundation  
725 for Statistical Computing, Vienna, Austria.
- 726 Ross, R. I. C. 2010. Local adaptation and adaptive divergence in a hybrid species complex in *Senecio*,  
727 University of Oxford, UK.
- 728 Royer, D. L., L. A. Meyerson, K. M. Robertson, and J. M. Adams. 2009. Phenotypic plasticity of leaf shape  
729 along a temperature gradient in *Acer rubrum*. *PLoS One* 4:e7653.
- 730 Scheepens, J. F., E. S. Frei, and J. Stöcklin. 2010. Genotypic and environmental variation in specific leaf area  
731 in a widespread Alpine plant after transplantation to different altitudes. *Oecologia* 164:141-150.
- 732 Schlichting, C. D. 1986. The Evolution of Phenotypic Plasticity in Plants. *Annual Review of Ecology and*  
733 *Systematics* 17:667-693.
- 734 Schmid, S. F., J. Stocklin, E. Hamann, and H. Kesselring. 2017. High-elevation plants have reduced  
735 plasticity in flowering time in response to warming compared to low-elevation congeners. *Basic and*  
736 *Applied Ecology* 21:1-12.
- 737 Schmitt, J., S. A. Dudley, and M. Pigliucci. 1999. Manipulative approaches to testing adaptive plasticity:  
738 phytochrome-mediated shade-avoidance responses in plants. *The American Naturalist* 154:S43-S54.
- 739 Serrano, M., F. Coluccia, M. Torres, F. L'Haridon, and J.-P. Métraux. 2014. The cuticle and plant defense to  
740 pathogens. *Frontiers in plant science* 5:274.
- 741 Shaw, J. R., T. H. Hampton, B. L. King, A. Whitehead, F. Galvez, R. H. Gross, N. Keith et al. 2014. Natural  
742 Selection Canalizes Expression Variation of Environmentally Induced Plasticity-Enabling Genes.  
743 *Molecular Biology and Evolution* 31:3002-3015.
- 744 Taylor, D. R., and L. W. Aarssen. 1988. An Interpretation of Phenotypic Plasticity in *Agropyron repens*  
745 (Graminae). *American Journal of Botany* 75:401-413.
- 746 Tsimilli-Michael, M., and R. J. Strasser. 2013. Biophysical Phenomics: Evaluation of the Impact of  
747 Mycorrhization with *Piriformospora indica*, Pages 173-190 in A. Varma, G. Kost, and R. Oelmüller,  
748 eds. *Piriformospora indica: Sebaciales and their biotechnological applications*. Berlin, Germany,  
749 Springer.
- 750 Via, S. 1993. Adaptive phenotypic plasticity: target or by-product of selection in a variable environment?  
751 *The American Naturalist* 142:352-365.
- 752 Via, S., R. Gomulkiewicz, G. De Jong, S. M. Scheiner, C. D. Schlichting, and P. H. Van Tienderen. 1995.  
753 Adaptive phenotypic plasticity: consensus and controversy. *Trends in Ecology & Evolution* 10:212-  
754 217.
- 755 Waddington, C. H. 1953. Genetic Assimilation of an Acquired Character. *Evolution* 7:118-126.
- 756 Walter, G. M., J. D. Aguirre, M. W. Blows, and D. Ortiz-Barrientos. 2018. Evolution of genetic variance  
757 during adaptive radiation. *The American Naturalist* 191:E108-E128.

758 Weinig, C., and L. F. Delph. 2001. Phenotypic plasticity early in life constrains developmental responses  
759 later. *Evolution* 55:930-936.

760

761
